# Supplementary material
Source: PubMed Central journal article supplement (PMC3205966)
Supplement: NIHMS324920-supplement-1_si_001.pdf [file NIHMS324920-supplement-1_si_001.pdf]

# Supporting Information

for

## Selective Synthesis of Hydroxy Analogues of Valinomycin using Dioxiranes

Cosimo Annese,<sup>\*,†</sup> Immacolata Fanizza,<sup>†</sup> Cosima D. Calvano,<sup>†</sup> Lucia D'Accolti,<sup>†</sup> Caterina Fusco,<sup>§</sup>  
Ruggero Curci,<sup>‡</sup> and Paul G. Williard<sup>\*,‡</sup>

<sup>†</sup>*Dipartimento Chimica, Università di Bari, v. Amendola 173, 70126 Bari, Italy.*

<sup>§</sup>*CNR-ICCOM, UOS Bari, Dipartimento di Chimica, v. Amendola 173, 70126 Bari, Italy*

<sup>‡</sup>*Department of Chemistry, Brown University, Providence, RI 02912.*

Corresponding authors Email: [pgw@brown.edu](mailto:pgw@brown.edu); [annese@chimica.uniba.it](mailto:annese@chimica.uniba.it)

---

**(30 pages, including this cover)**

---

### Table of Contents

|    |                                                           |               |
|----|-----------------------------------------------------------|---------------|
| 1. | Materials and Methods                                     | p. <i>S1</i>  |
| 2. | NMR Spectral Data of Compounds <b>3a-c</b>                | p. <i>S3</i>  |
| 3. | 1D-, 2D NMR, and MALDI mass spectra of compound <b>3a</b> | p. <i>S6</i>  |
| 4. | 1D-, 2D NMR, and MALDI mass spectra of compound <b>3b</b> | p. <i>S14</i> |
| 5. | 1D-, 2D NMR, and MALDI mass spectra of compound <b>3c</b> | p. <i>S22</i> |

---

## 1. Materials and Methods

The  $^1\text{H}$  NMR spectra (400 MHz) were referenced to residual isotopic impurity (2.05 ppm) of acetone- $d_6$  solvent and/or TMS. The  $^{13}\text{C}$  NMR spectra (100 MHz) were referenced to the middle peak of acetone- $d_6$  solvent (30.83 ppm).

The mass spectra were obtained using a Micromass M@LDI<sup>TM</sup>-LR (Waters MS Technologies, time-of-flight mass spectrometer equipped with a nitrogen UV laser (337 nm) reflectron optics, fast dual micro-channel plate (MCP) detector. Previous to MS analysis, the samples (dissolved in acetonitrile) were mixed (1:1, v:v) with a 2,5-dihydroxybenzoic acid (DHB) solution [10 mg/mL, in acetonitrile (saturated with KCl)/water 50:50].

The HPLC analyses were run using a Supelcosil ABZ+plus column (150×4.6 mm, 5 mm) or a silica gel (Ascentis<sup>®</sup> Si, 250 × 2.1 mm, 5 mm). Preparative HPLC separations were carried out on a silica gel column (Ascentis<sup>®</sup> Si, 250 × 10 mm, 5 μm).

Acetone and other common solvents were purified by standard methods. Commercial Valinomycin (**2**) of >95% purity (HPLC) was used without further purification. Commercial 1,1,1-trifluoro-2-propanone (TFP) (bp 22 °C), was purified by fractional distillation over granular P<sub>2</sub>O<sub>5</sub>, stored over 5 Å molecular sieves, and routinely redistilled prior to use. Carcoat<sup>®</sup> triple salt 2KHSO<sub>5</sub>·KHSO<sub>4</sub>·K<sub>2</sub>SO<sub>4</sub> (a gift from Peroxid-Chemie, Degussa, Germany) was our source of potassium peroxymonosulfate, employed in the synthesis of dioxirane **1b**. Solutions of 0.5-1.0 M methyl(trifluoromethyl)dioxirane (**1b**) in 1,1,1-trifluoropropanone (TFP) were obtained by adopting procedures, equipment, and precautions already reported in detail (Mello, R.; Fiorentino, M.; Fusco, C.; Curci, R. *J. Am. Chem. Soc.* **1989**, *111*, 6749).

The following procedure is representative of valinomycin (**2**) oxidation using TFDO (**1b**):

**Monohydroxylation of valinomycin.** A standardized cold solution of TFDO (**1b**) in 1,1,1-trifluoropropanone (TFP) (0.9 M, 1 mL, 0.9 mmol) is added in one portion to a stirred solution of VLM (**2**) (100 mg, 0.090 mmol) in acetone (2 mL) kept at 0 °C. The reaction progress is monitored by HPLC (30 minutes, linear gradient of 70-100% acetonitrile in water; flow rate: 1.0 mL/min; UV detector 220

nm). After 6 h reaction time at 0 °C, the solvent is removed under reduced pressure and the product mixture separated from the unreacted starting material by column chromatography (silica gel, ethyl ether/hexane 3:1). This allows the recover of unreacted valinomycin (55 mg, 0.049 mmol). The mixture of products thus separated in turn undergoes treatment with preparative HPLC (hexane/isopropanol 95:5, flow rate 2.0 mL/min, UV detector 220 nm), affording each reaction products as an amorphous solid in > 95% purity (HPLC): **3a** (16.0 mg , 14  $\mu$ mol), **3b** (10.0 mg , 8.9  $\mu$ mol), and **3c** (9.1 mg, 8.1  $\mu$ mol). Based on the amount valinomycin converted (45 mg), the yield of **3a**, **3b**, and **3c** is estimated as 35, 22, and 20%, respectively.

The NMR spectral data of compound **3a-c** are collected in Tables *SI-S6*. Spectra are shown in Figures *SI-S24*.

Structure assignment of compounds **3a**, **3b**, and **3c** was based on their 1D NMR ( $^1\text{H}$ ,  $^{13}\text{C}$ , DEPT-135) and 2D NMR (COSY, NOESY, HMQC, HMBC) spectra. The procedure relied on sequence-specific assignments based on the residual  $\text{NH}_{i+1}$ - $\alpha\text{H}_i$  correlations provided by the corresponding  $^1\text{H}$ - $^1\text{H}$  NOESY NMR spectra. (Cavanagh, J. et al. in *Protein NMR Spectroscopy: Principles and Practice*; Academic, 1996; Chapter 8) This approach was especially useful in discriminating compound **3b** from **3c**, since their structural divergences derive almost entirely from the different residues that are proximal to the hydroxylated valine moiety. For instance, the NMR structure determination of **3b** began by the assignment of the  $^1\text{H}$  NMR six downfield doublet signals in the 8.06  $\div$  7.60 ppm range to the resonance of the six amide protons. In turn, by means of the COSY correlations, the signals in the 4.45  $\div$  4.20 ppm range could be attributed to the resonance of the  $\alpha$ -CH protons of the valine residues. As a result of dioxirane *O*-insertion into the  $\beta$ -CH bond of the *D*-Val residue, its  $\alpha$ -CH proton resonance (4.45 ppm) appears as a clean doublet, due to single coupling with the vicinal NH proton. The latter resonance was eventually identified as a doublet at 7.60 ppm by the corresponding COSY cross-peak.

## 2. NMR Spectral Data of Compound 3a-c.

**Table S1.**  $^1\text{H}$  NMR Chemical shift values (ppm) for compound 3a.<sup>a,b</sup>

|                           | Residue               |                                |                                                                                            |                                                                                        |                                                   |
|---------------------------|-----------------------|--------------------------------|--------------------------------------------------------------------------------------------|----------------------------------------------------------------------------------------|---------------------------------------------------|
|                           | D- $\beta$ -OH-Hyi    | D-Hyi                          | D-Val                                                                                      | L-Val                                                                                  | L-Lac                                             |
| NH                        | -                     | -                              | 7.74 (d, 8.4) <sup>d,e</sup><br>7.662 (d, 7.6) <sup>d</sup><br>7.657 (d, 7.6) <sup>d</sup> | 7.97 (d, 7.6) <sup>d</sup><br>7.94 (d, 6.8) <sup>d</sup><br>7.92 (d, 7.2) <sup>d</sup> | -                                                 |
| $\alpha$ -CH              | 4.95 (s)              | 5.01 (d, 4.0)<br>5.00 (d, 3.6) | 4.43 (dd, 8.4, 7.2) <sup>e</sup><br>4.39-4.34 (m, 2H)                                      | 4.26-4.18 (m, 3H)                                                                      | 5.43-5.35 (m, 3H)                                 |
| $\beta$ -CH               | 4.52 (s) <sup>c</sup> | 2.39 - 2.14 (m, 8H)            |                                                                                            |                                                                                        | -                                                 |
| $\beta$ -CH <sub>3</sub>  | -                     | -                              | -                                                                                          | -                                                                                      | 1.42 (d, 6.8)<br>1.409 (d, 6.8)<br>1.406 (d, 6.4) |
| $\gamma$ -CH <sub>3</sub> | 1.28 (s)<br>1.24 (s)  | 1.08 - 0.96 (m, 48H)           |                                                                                            |                                                                                        | -                                                 |

<sup>a</sup>Data are for spectra in acetone-*d*<sub>6</sub> at 400 MHz. <sup>b</sup>Signal multiplicity, *J* values ( $\pm 0.4$  Hz), and signal integration values (if >1) are specified in parentheses. <sup>c</sup>Resonance of the  $\beta$ -OH proton. <sup>d</sup>Assigned on the basis of the NOESY spectrum (Fig. S5). <sup>e</sup>Relative to the D-Hyi residue sequential to the D- $\beta$ -OH-Val residue.

**Table S2.**  $^{13}\text{C}$  NMR Chemical shift values (ppm) for compound 3a.<sup>a</sup>

|                           | Residue                                                                |                                                                                     |                                           |                      |                    |
|---------------------------|------------------------------------------------------------------------|-------------------------------------------------------------------------------------|-------------------------------------------|----------------------|--------------------|
|                           | D- $\beta$ -OH-Hyi                                                     | D-Hyi                                                                               | D-Val                                     | L-Val                | L-Lac              |
| C=O                       | 173.5, 173.4, 173.22, 173.16, 173.0, 172.2, 172.0, 171.4, 171.3, 171.0 |                                                                                     |                                           |                      |                    |
| $\alpha$ -CH              | 80.8                                                                   | 80.12<br>80.08                                                                      | 59.9<br>59.8<br>59.6                      | 61.3<br>61.2<br>61.1 | 72.05<br>71.09 [2] |
| $\beta$ -CH               | 72.6 <sup>b</sup>                                                      | 32.17 [2]                                                                           | 31.8, 31.61, 31.58, 31.1,<br>30.88, 30.86 |                      | -                  |
| $\beta$ -CH <sub>3</sub>  | -                                                                      | -                                                                                   | -                                         | -                    | 18.38<br>18.35 [2] |
| $\gamma$ -CH <sub>3</sub> | 27.8<br>27.3                                                           | 20.7 [4], 20.6, 20.5, 20.4 [2], 20.3 [2], 20.2,<br>19.93, 19.89, 19.7, 18.07, 18.02 |                                           |                      | -                  |

<sup>a</sup>Data are for spectra in acetone-*d*<sub>6</sub> at 100 MHz. <sup>b</sup>Resonance of the C-OH carbon.

**Table S3.** <sup>1</sup>H NMR Chemical shift values (ppm) for compound **3b**.<sup>a,b</sup>

|                   | Residue               |                                                             |                                                          |                                                                                        |                   |
|-------------------|-----------------------|-------------------------------------------------------------|----------------------------------------------------------|----------------------------------------------------------------------------------------|-------------------|
|                   | D-β-OH-Val            | D-Hyi                                                       | D-Val                                                    | L-Val                                                                                  | L-Lac             |
| NH                | 7.60 (d, 8.8)         | -                                                           | 7.72 (d, 8.0) <sup>d</sup><br>7.64 (d, 8.4) <sup>d</sup> | 8.06 (d, 6.8) <sup>d</sup><br>7.89 (d, 7.6) <sup>d</sup><br>7.87 (d, 7.6) <sup>d</sup> | -                 |
| α-CH              | 4.45 (d, 8.8)         | 5.04 (d, 3.6) <sup>e</sup><br>5.02 (d, 3.2)<br>5.01(d, 3.6) | 4.36 (pseudo-t, 8.0)                                     | 4.24-4.16 (m, 2H)                                                                      | 5.39-5.30 (m, 3H) |
|                   |                       |                                                             | 4.32-4.28 (m, 2H)                                        |                                                                                        |                   |
| β-CH              | 4.57 (s) <sup>c</sup> | 2.40-2.14 (m, 8H)                                           |                                                          |                                                                                        | -                 |
| β-CH <sub>3</sub> | -                     | -                                                           | -                                                        | -                                                                                      | 1.43-1.39 (m, 9H) |
| γ-CH <sub>3</sub> | 1.35 (s)<br>1.31 (s)  | 1.10-0.97 (m, 48H)                                          |                                                          |                                                                                        | -                 |

<sup>a</sup>Footnote a, Table S1. <sup>b</sup>Footnote b, Table S1. <sup>c</sup>Resonance of the β-OH proton. <sup>d</sup>Assigned on the basis of the NOESY spectrum (Fig. S11). <sup>e</sup>Relative to the D-Hyi residue sequential to the D-β-OH-Val residue.

**Table S4.** <sup>13</sup>C NMR Chemical shift values (ppm) for compound **3b**.<sup>a</sup>

|                   | Residue                                                                                |                                                                                            |                                   |                      |                        |
|-------------------|----------------------------------------------------------------------------------------|--------------------------------------------------------------------------------------------|-----------------------------------|----------------------|------------------------|
|                   | D-β-OH-Val                                                                             | D-Hyi                                                                                      | D-Val                             | L-Val                | L-Lac                  |
| C=O               | 173.9, 173.40, 173.38, 173.25, 173.19, 173.0, 172.1, 172.0, 171.5, 171.2, 171.0, 170.7 |                                                                                            |                                   |                      |                        |
| α-CH              | 62.9                                                                                   | 80.2 [2]<br>80.1                                                                           | 60.1<br>59.8                      | 61.3<br>61.2<br>61.0 | 72.3<br>72.0<br>71.7   |
| β-CH              | 72.6 <sup>b</sup>                                                                      | 32.2 [2]<br>32.1                                                                           | 31.5, 31.2, 31.11,<br>31.10, 30.9 |                      | -                      |
| β-CH <sub>3</sub> | -                                                                                      | -                                                                                          | -                                 | -                    | 18.6<br>18.44<br>18.36 |
| γ-CH <sub>3</sub> | 28.9<br>28.7                                                                           | 20.64 [2], 20.58 [3], 20.4,<br>20.32 [2], 20.28, 20.2, 20.0<br>[2], 19.9, 18.14, 18.09 [2] |                                   |                      | -                      |

<sup>a</sup>Footnote a, Table S2. <sup>b</sup>Resonance of the C-OH carbon.

**Table S5.**  $^1\text{H}$  NMR Chemical shift values (ppm) for compound **3c**.<sup>a,b</sup>

|                           | Residue               |                                    |                                                                                        |                                                          |                   |
|---------------------------|-----------------------|------------------------------------|----------------------------------------------------------------------------------------|----------------------------------------------------------|-------------------|
|                           | L- $\beta$ -OH-Val    | D-Hyi                              | D-Val                                                                                  | L-Val                                                    | L-Lac             |
| NH                        | 7.70 (d, 7.2)         | -                                  | 7.81 (d, 7.6) <sup>d</sup><br>7.67 (d, 8.0) <sup>d</sup><br>7.66 (d, 8.0) <sup>d</sup> | 7.95 (d, 7.2) <sup>d</sup><br>7.88 (d, 7.2) <sup>d</sup> | -                 |
| $\alpha$ -CH              | 4.37 (d, 7.2)         | 5.04 (d, 3.6, 2H)<br>5.02 (d, 4.0) | 4.37 (pseudo-t, 8.0)<br>4.31 (pseudo-t, 7.6)<br>4.30 (pseudo-t, 8.0)                   | 4.28-4.22 (m, 2H)                                        | 5.37-5.28 (m, 3H) |
| $\beta$ -CH               | 4.52 (s) <sup>c</sup> | 2.40-2.19 (m, 8H)                  |                                                                                        |                                                          | -                 |
| $\beta$ -CH <sub>3</sub>  | -                     | -                                  | -                                                                                      | -                                                        | 1.44-1.40 (m, 9H) |
| $\gamma$ -CH <sub>3</sub> | 1.34 (s)<br>1.33 (s)  | 1.08-0.94 (m, 48H)                 |                                                                                        |                                                          | -                 |

<sup>a</sup>Footnote a, Table S1. <sup>b</sup>Footnote b, Table S1. <sup>c</sup>Resonance of the  $\beta$ -OH proton. <sup>d</sup>Assigned on the basis of the NOESY spectrum (Fig. S19). <sup>e</sup>Relative to the D-Hyi residue sequential to the L- $\beta$ -OH-Val.

**Table S6.**  $^{13}\text{C}$  NMR Chemical shift values (ppm) for compound **3c**.<sup>a</sup>

|                 | Residue                                                                      |                                                                                                             |                                |              |                         |
|-----------------|------------------------------------------------------------------------------|-------------------------------------------------------------------------------------------------------------|--------------------------------|--------------|-------------------------|
|                 | L- $\beta$ -OH-Val                                                           | D-Hyi                                                                                                       | D-Val                          | L-Val        | L-Lac                   |
| C=O             | 173.2, 173.0, 172.16, 172.14, 172.12, 171.87, 171.85, 171.82, 171.54, 171.45 |                                                                                                             |                                |              |                         |
| $\alpha$ -CH    | 63.6                                                                         | 80.2<br>80.1<br>79.8                                                                                        | 60.4<br>60.2<br>59.8           | 61.1<br>61.0 | 72.16<br>72.14<br>71.03 |
| $\beta$ -CH     | 72.08 <sup>b</sup>                                                           | 32.3<br>32.24<br>32.15                                                                                      | 31.5, 31.2, 31.11, 31.10, 30.9 |              | -                       |
| CH <sub>3</sub> | 28.6 ( $\gamma$ -CH <sub>3</sub> )<br>28.2 ( $\gamma'$ -CH <sub>3</sub> )    | 20.7 [2], 20.5 [2], 20.4 [2], 20.36, 20.2 [2], 20.1, 20.0, 19.9, 18.8, 18.7, 18.6, 18.4, 18.2, 18.03, 18.00 |                                |              |                         |

<sup>a</sup>Footnote a, Table S2. <sup>b</sup>Resonance of the C-OH carbon.

### 3. 1D-, 2D NMR, and MALDI spectra of compound 3a.

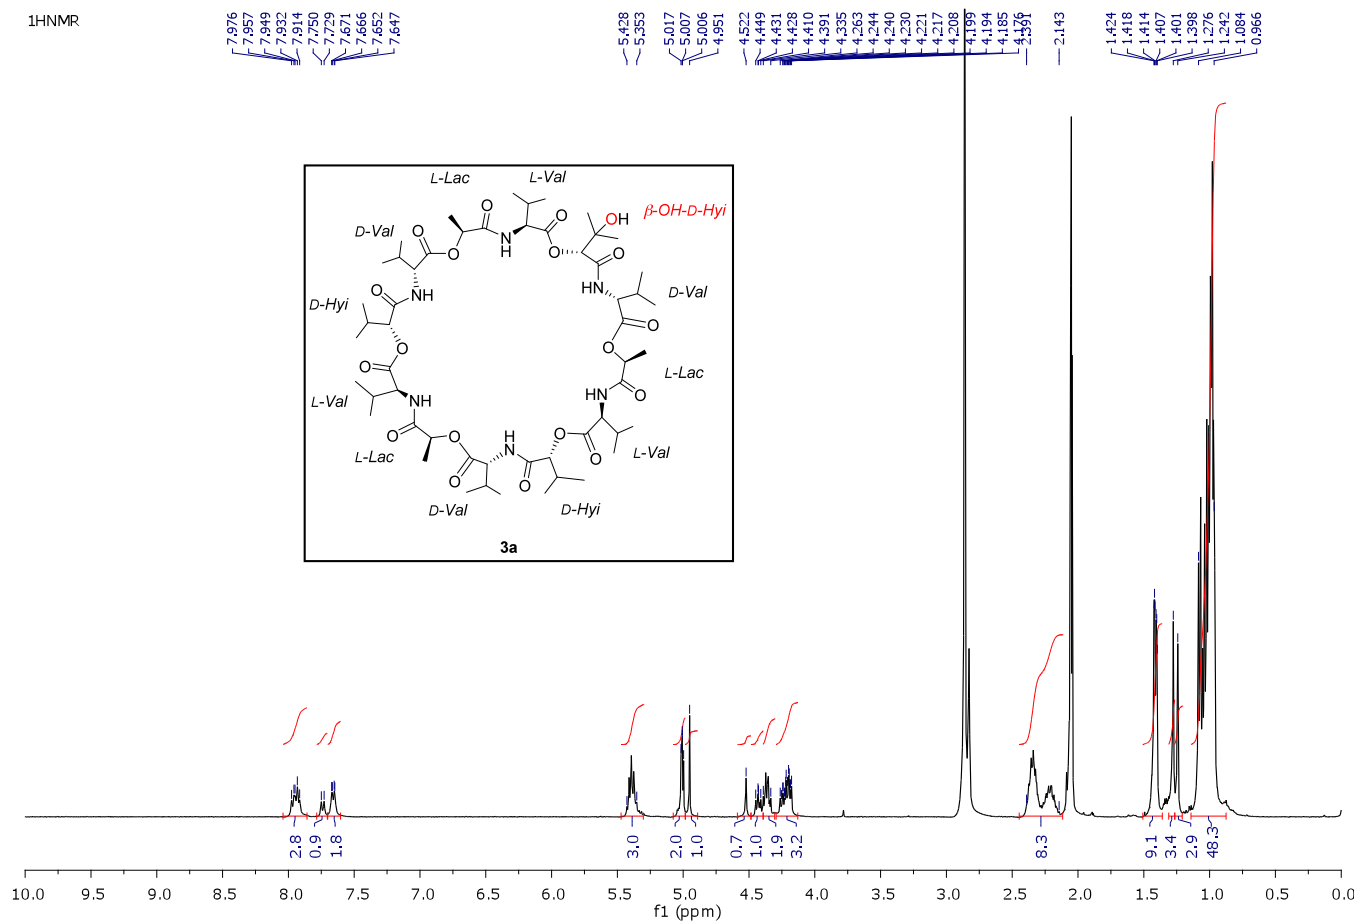

**Figure S1.** <sup>1</sup>H NMR spectrum of compound **3a** (acetone-*d*<sub>6</sub>, 400 MHz).

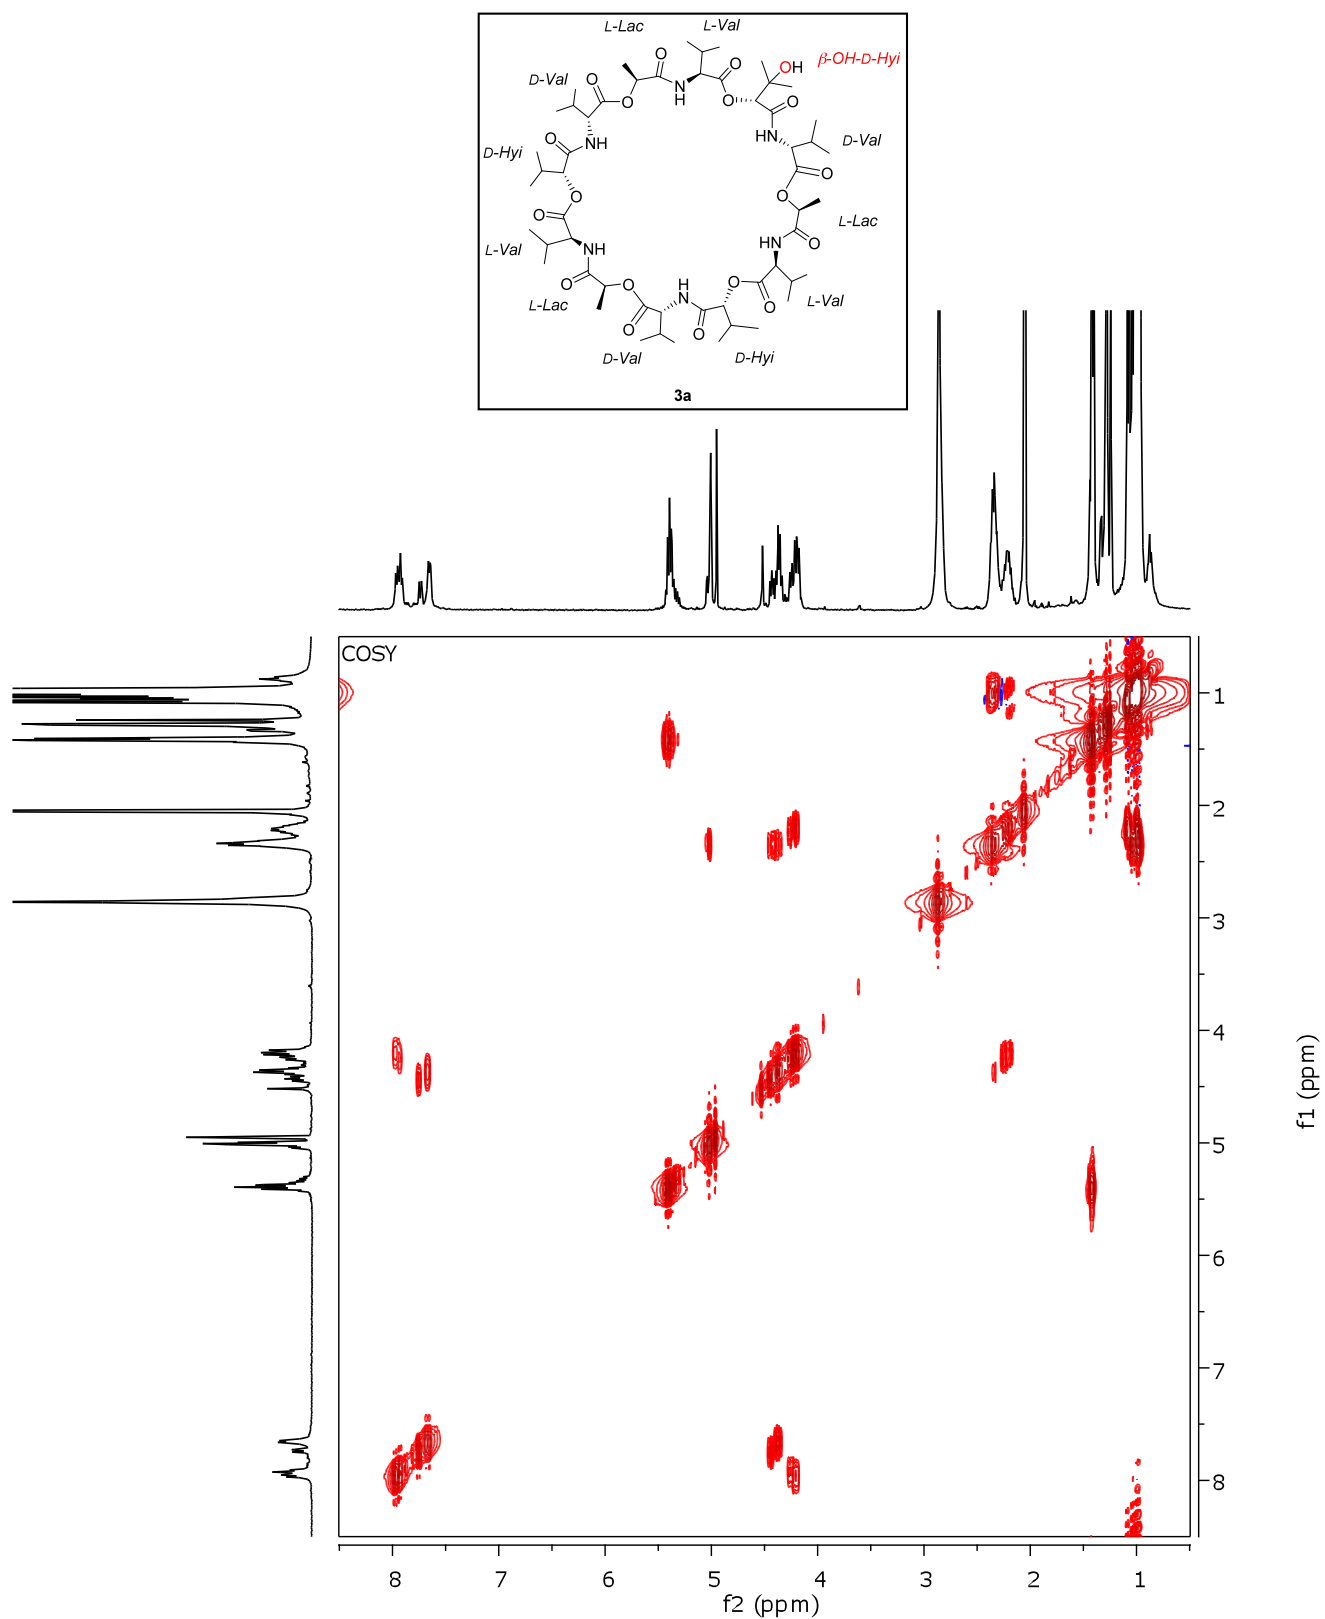

**Figure S2.** COSY NMR spectrum of compound **3a** (acetone- $d_6$ , 400 MHz).



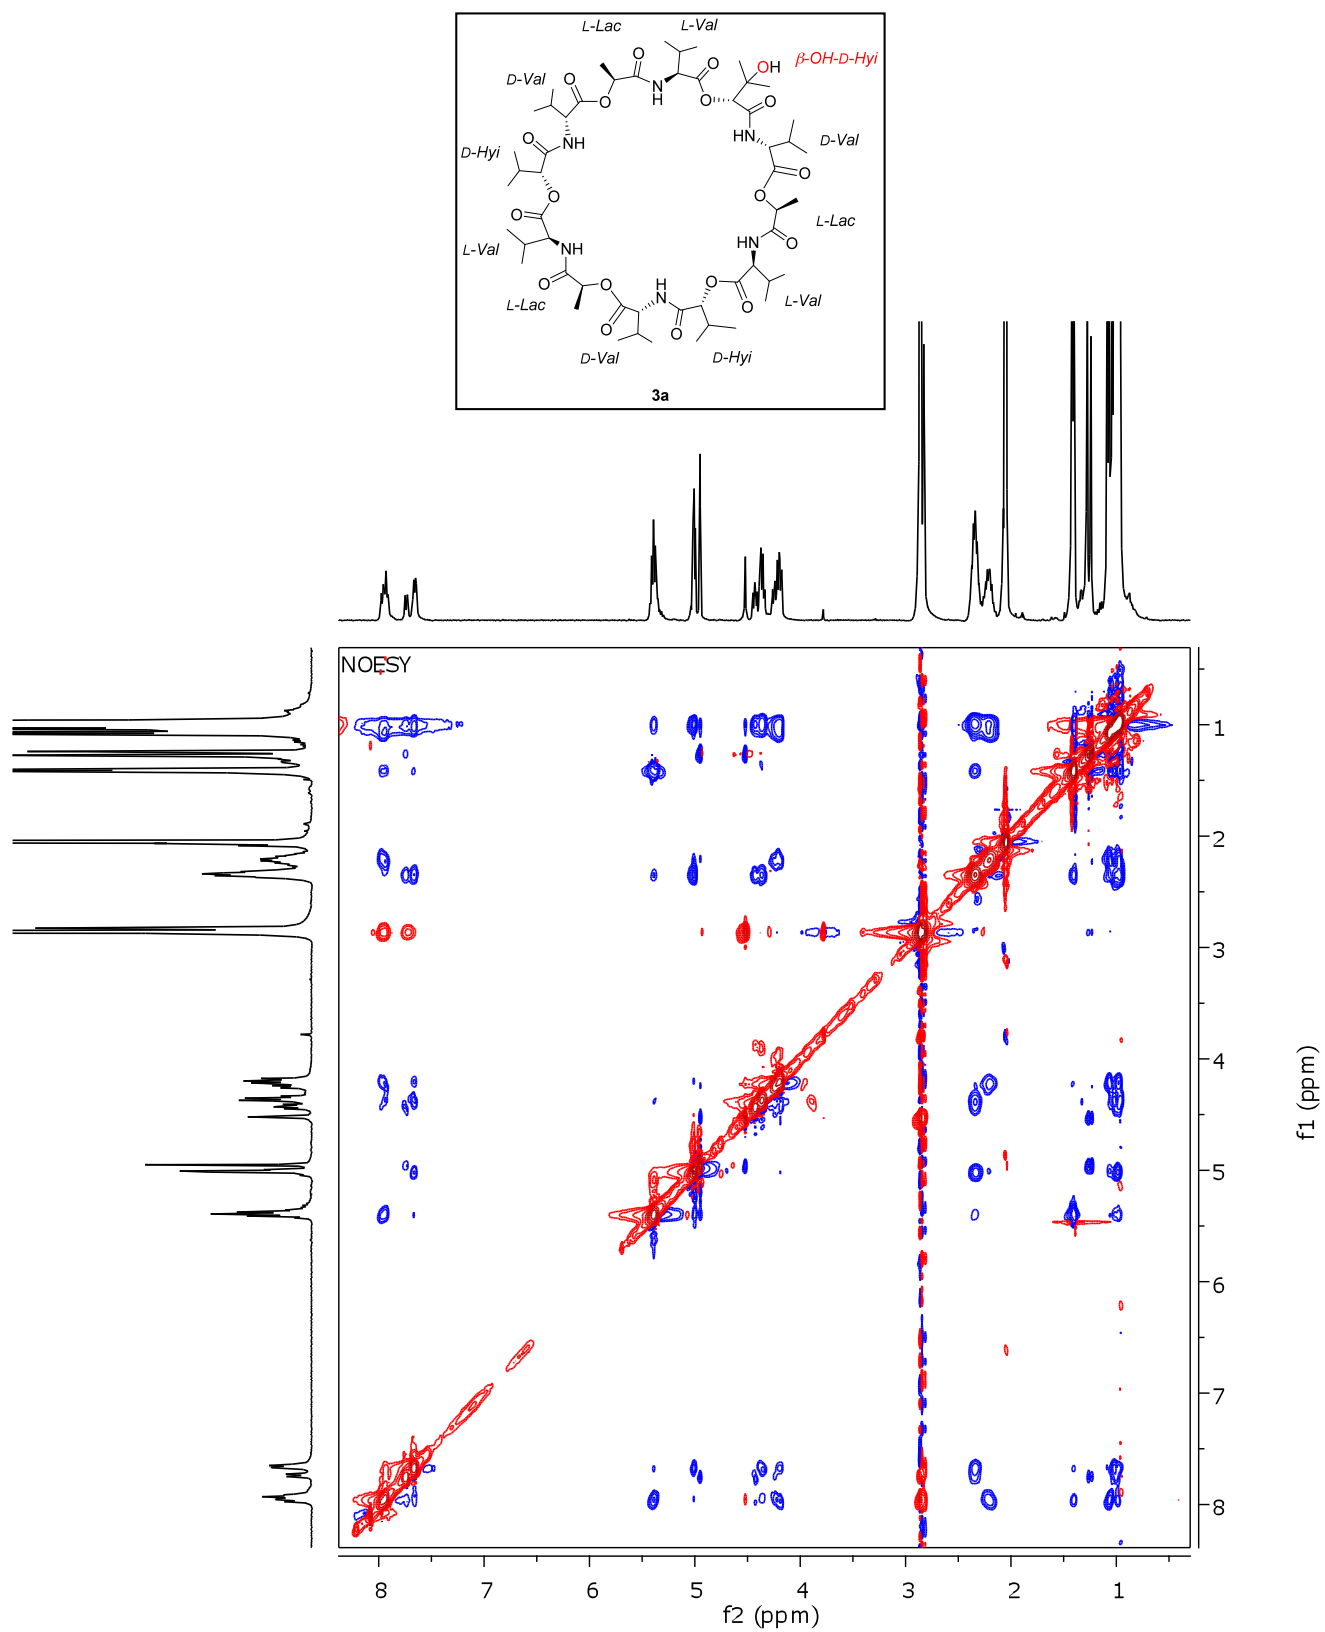

**Figure S3.** NOESY NMR spectrum of compound **3a** (acetone- $d_6$ , 400 MHz,  $t_{\text{mix}} = 0.35$  sec).

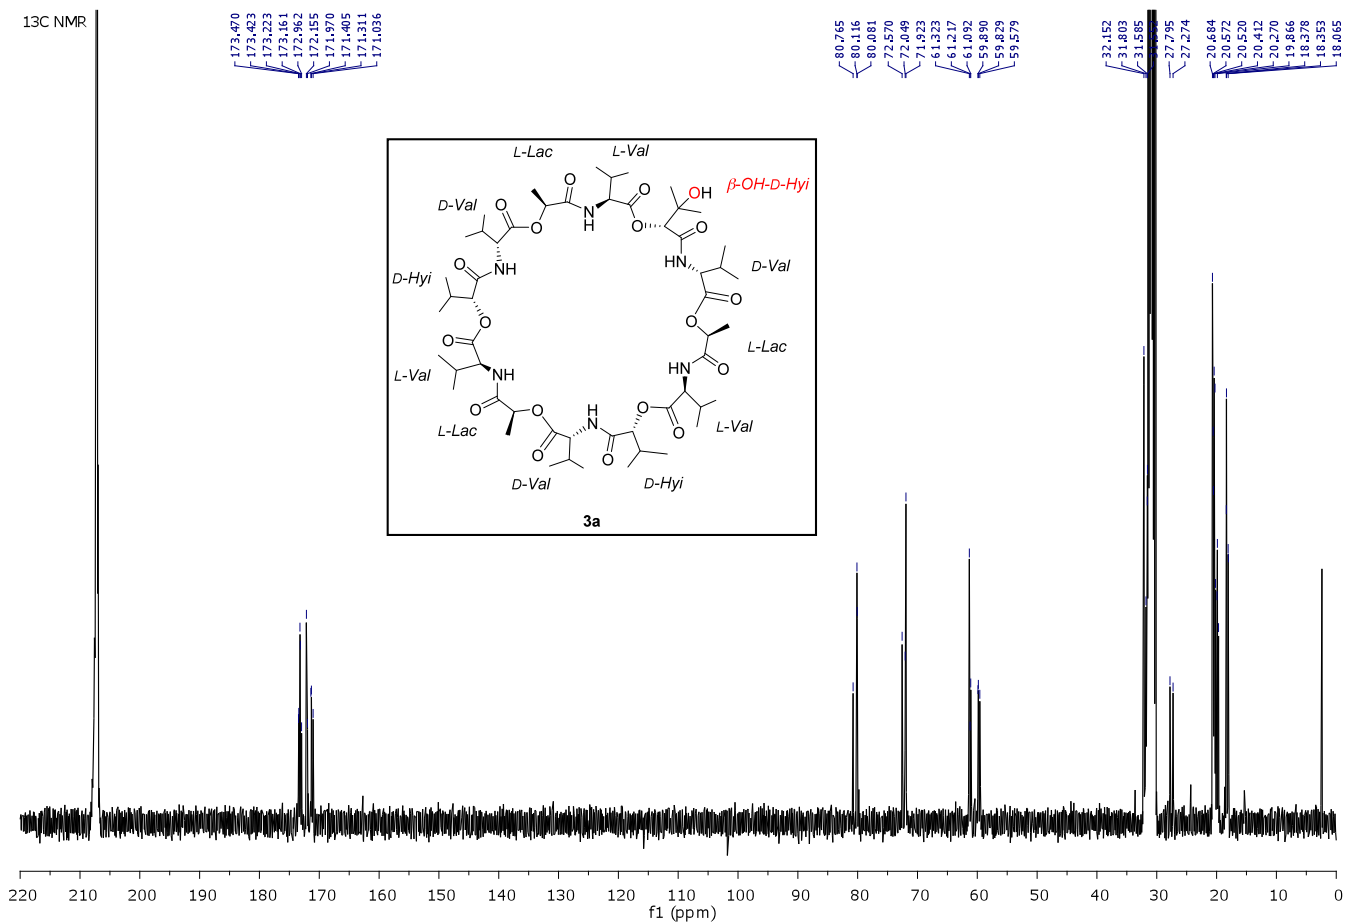

**Figure S4.**  $^{13}\text{C}$  NMR spectrum of compound **3a** (acetone- $d_6$ , 100 MHz).

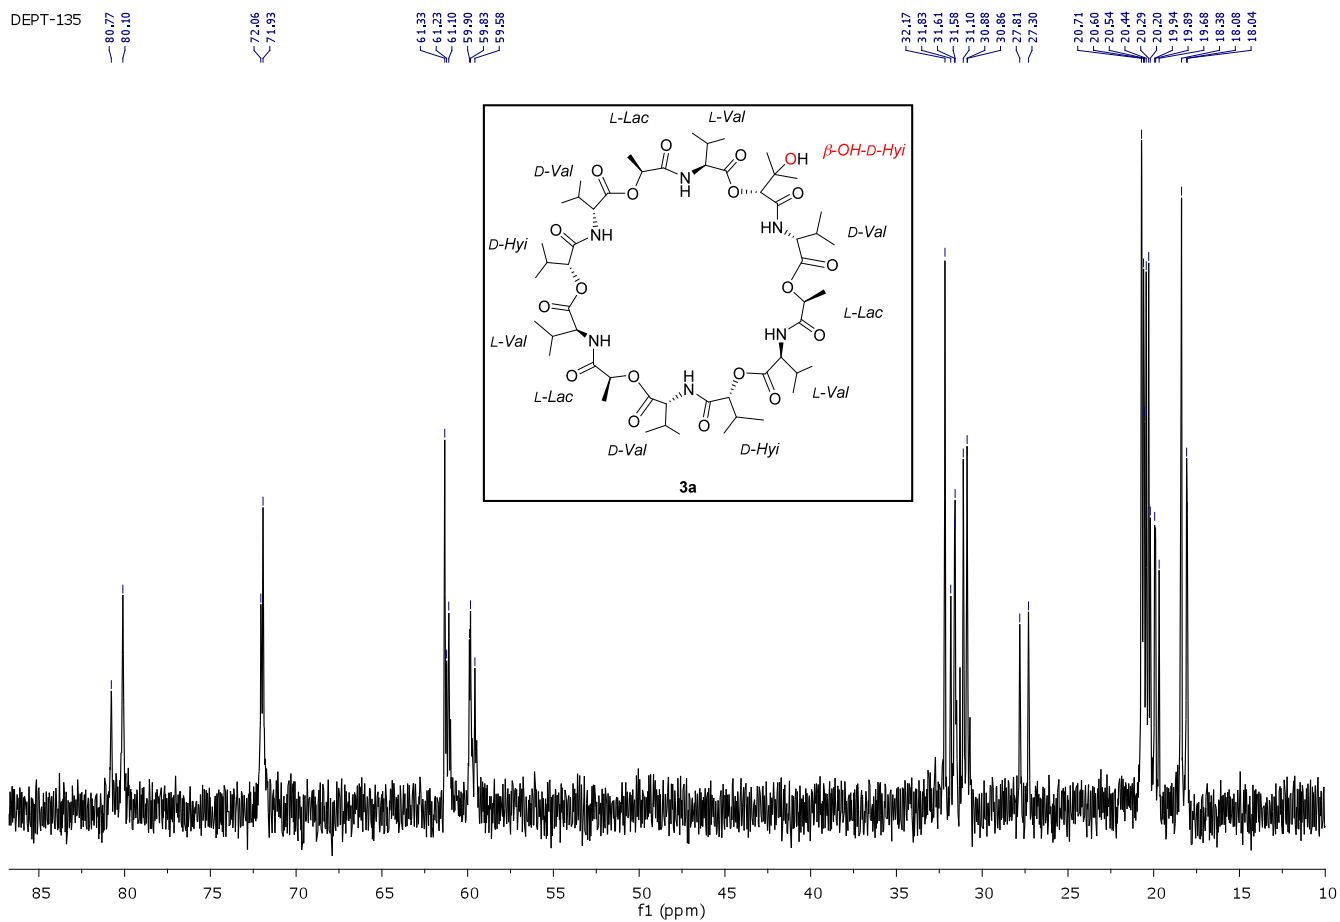

**Figure S5.**  $^{13}\text{C}$  DEPT-135 NMR spectrum of compound **3a** (acetone- $d_6$ , 100 MHz).

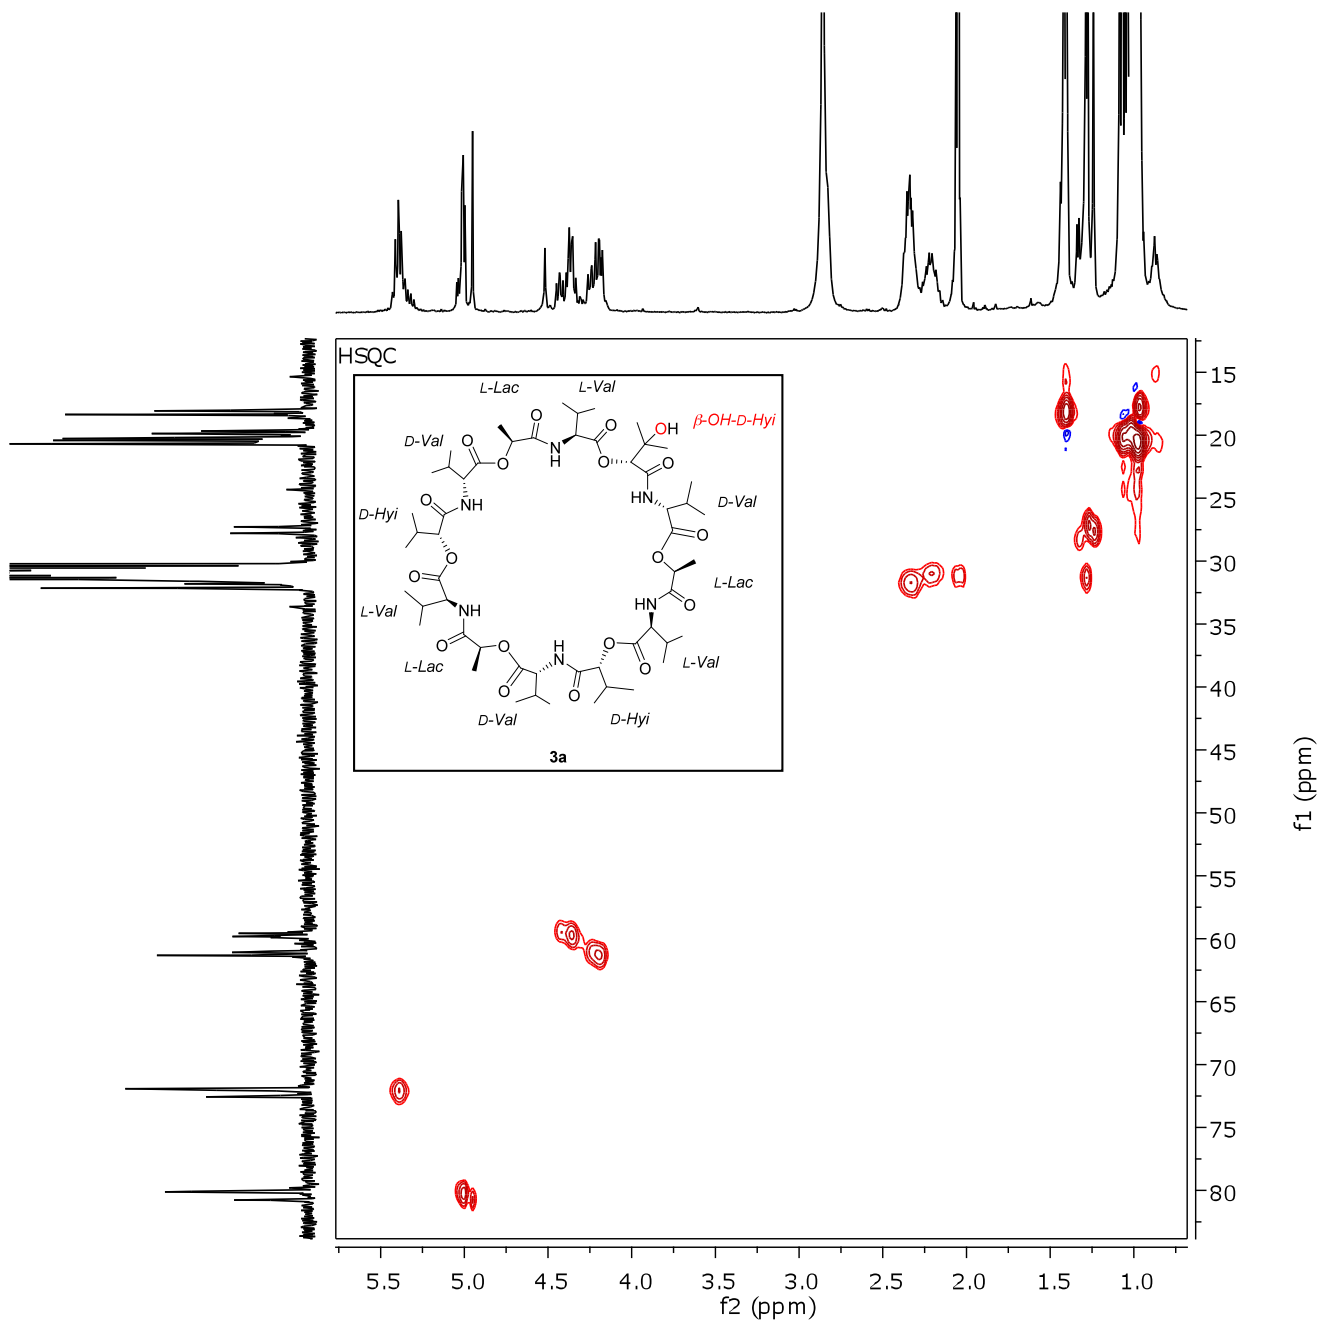

**Figure S6.** HSQC NMR spectrum of compound **3a** (acetone- $d_6$ , 400 MHz).

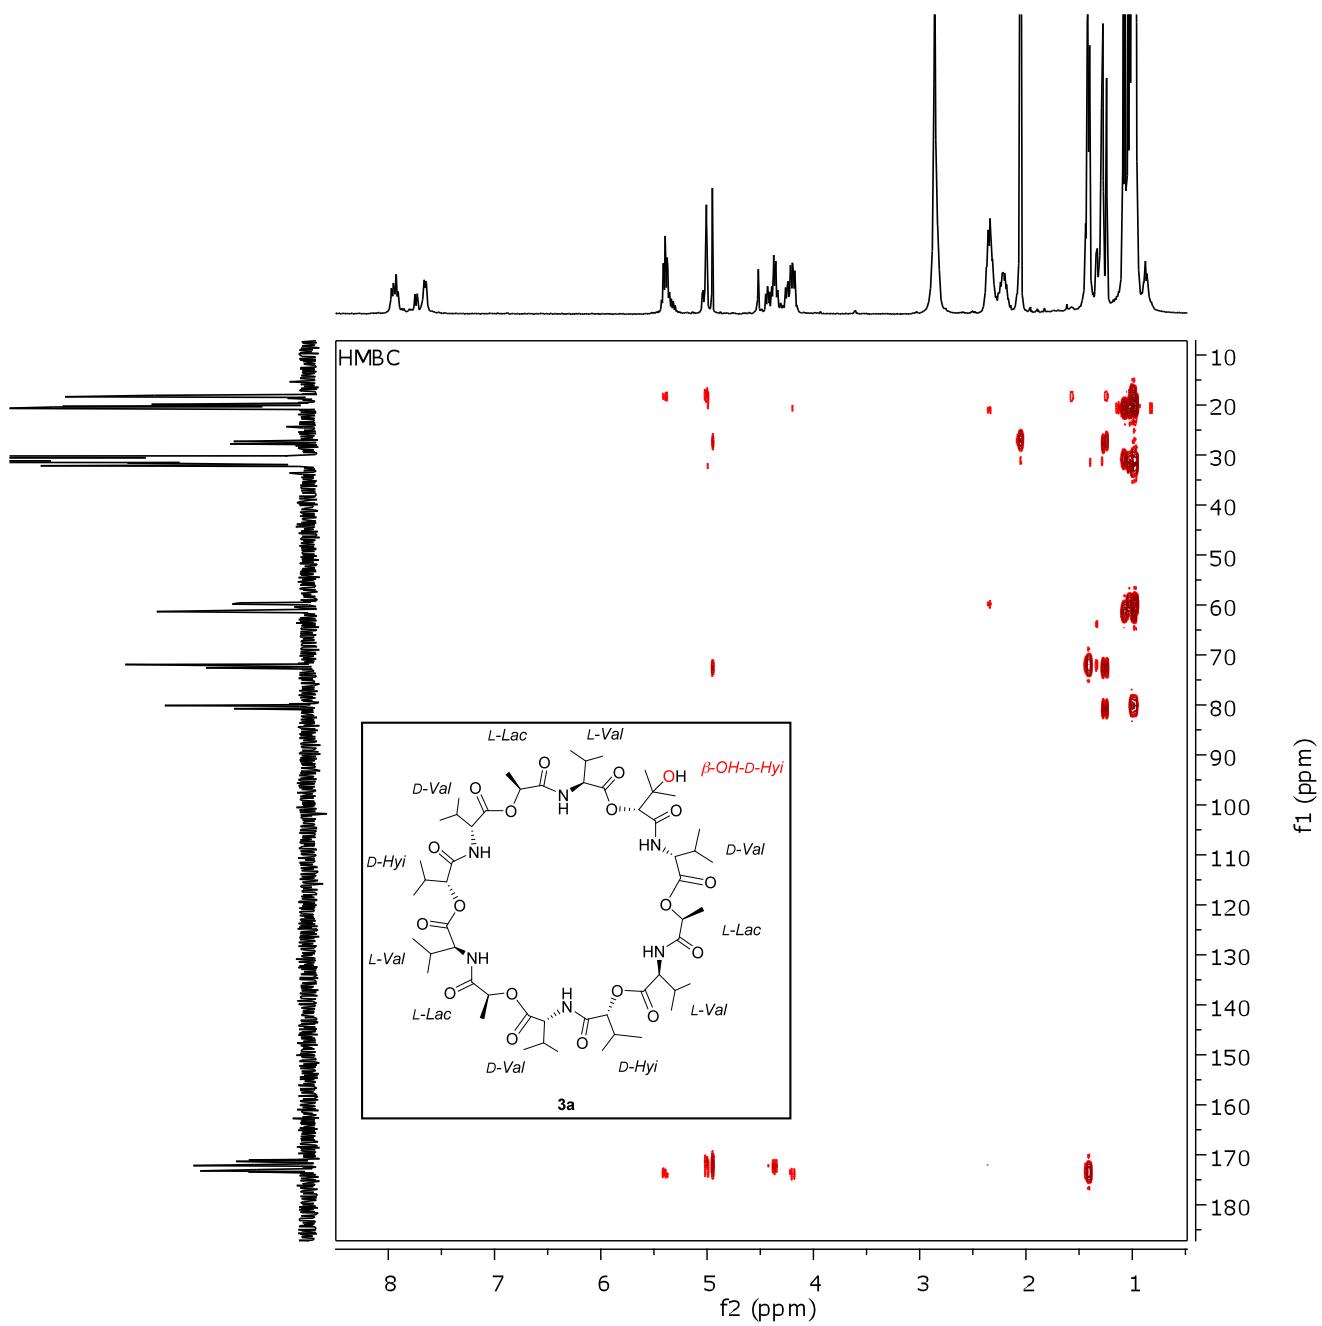

**Figure S7.** HMBC NMR spectrum of compound **3a** (acetone- $d_6$ , 400 MHz).

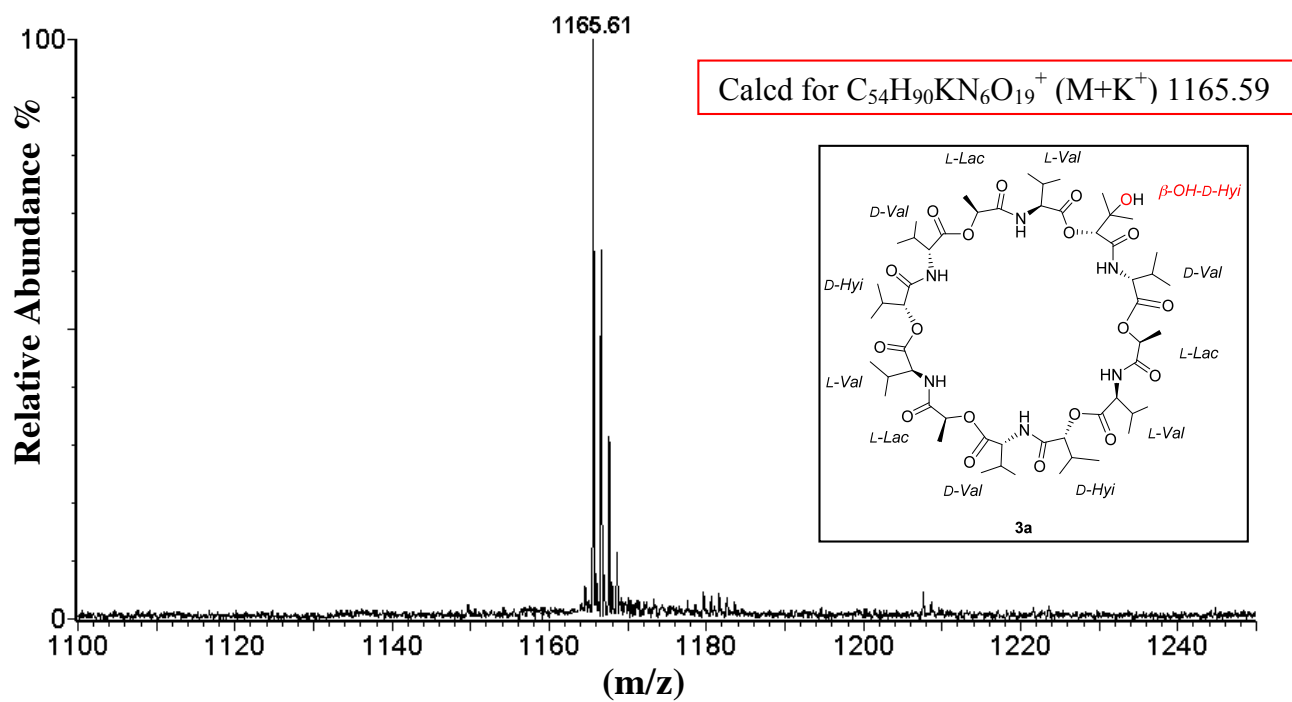

**Figure S8.** MALDI-ToF mass spectrum of compound **3a** in the presence of KCl.

#### 4. 1D-, 2D NMR, and MALDI spectra of compound 3b.

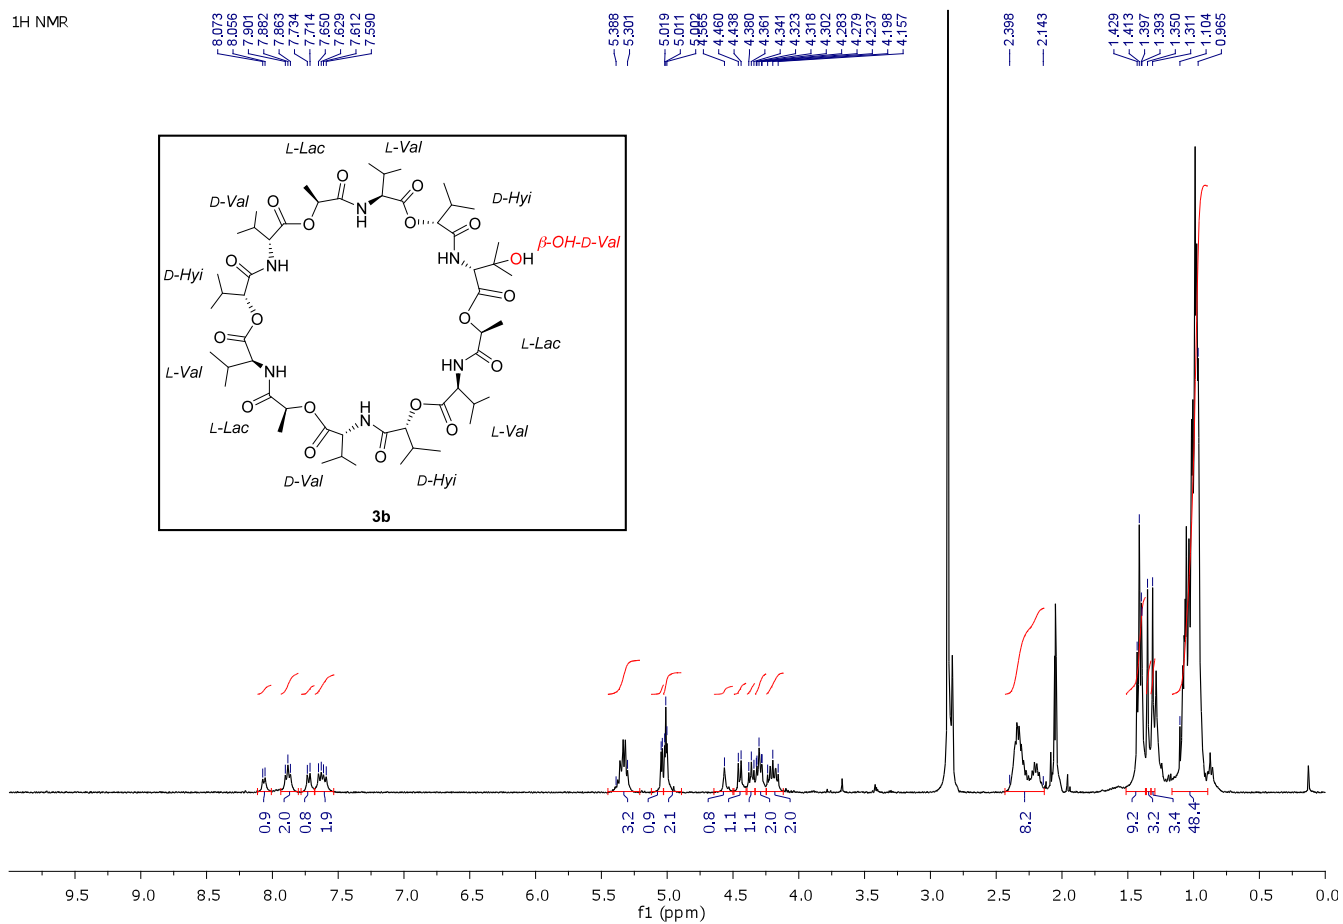

**Figure S9.** <sup>1</sup>H NMR spectrum of compound **3b** (acetone-*d*<sub>6</sub>, 400 MHz).

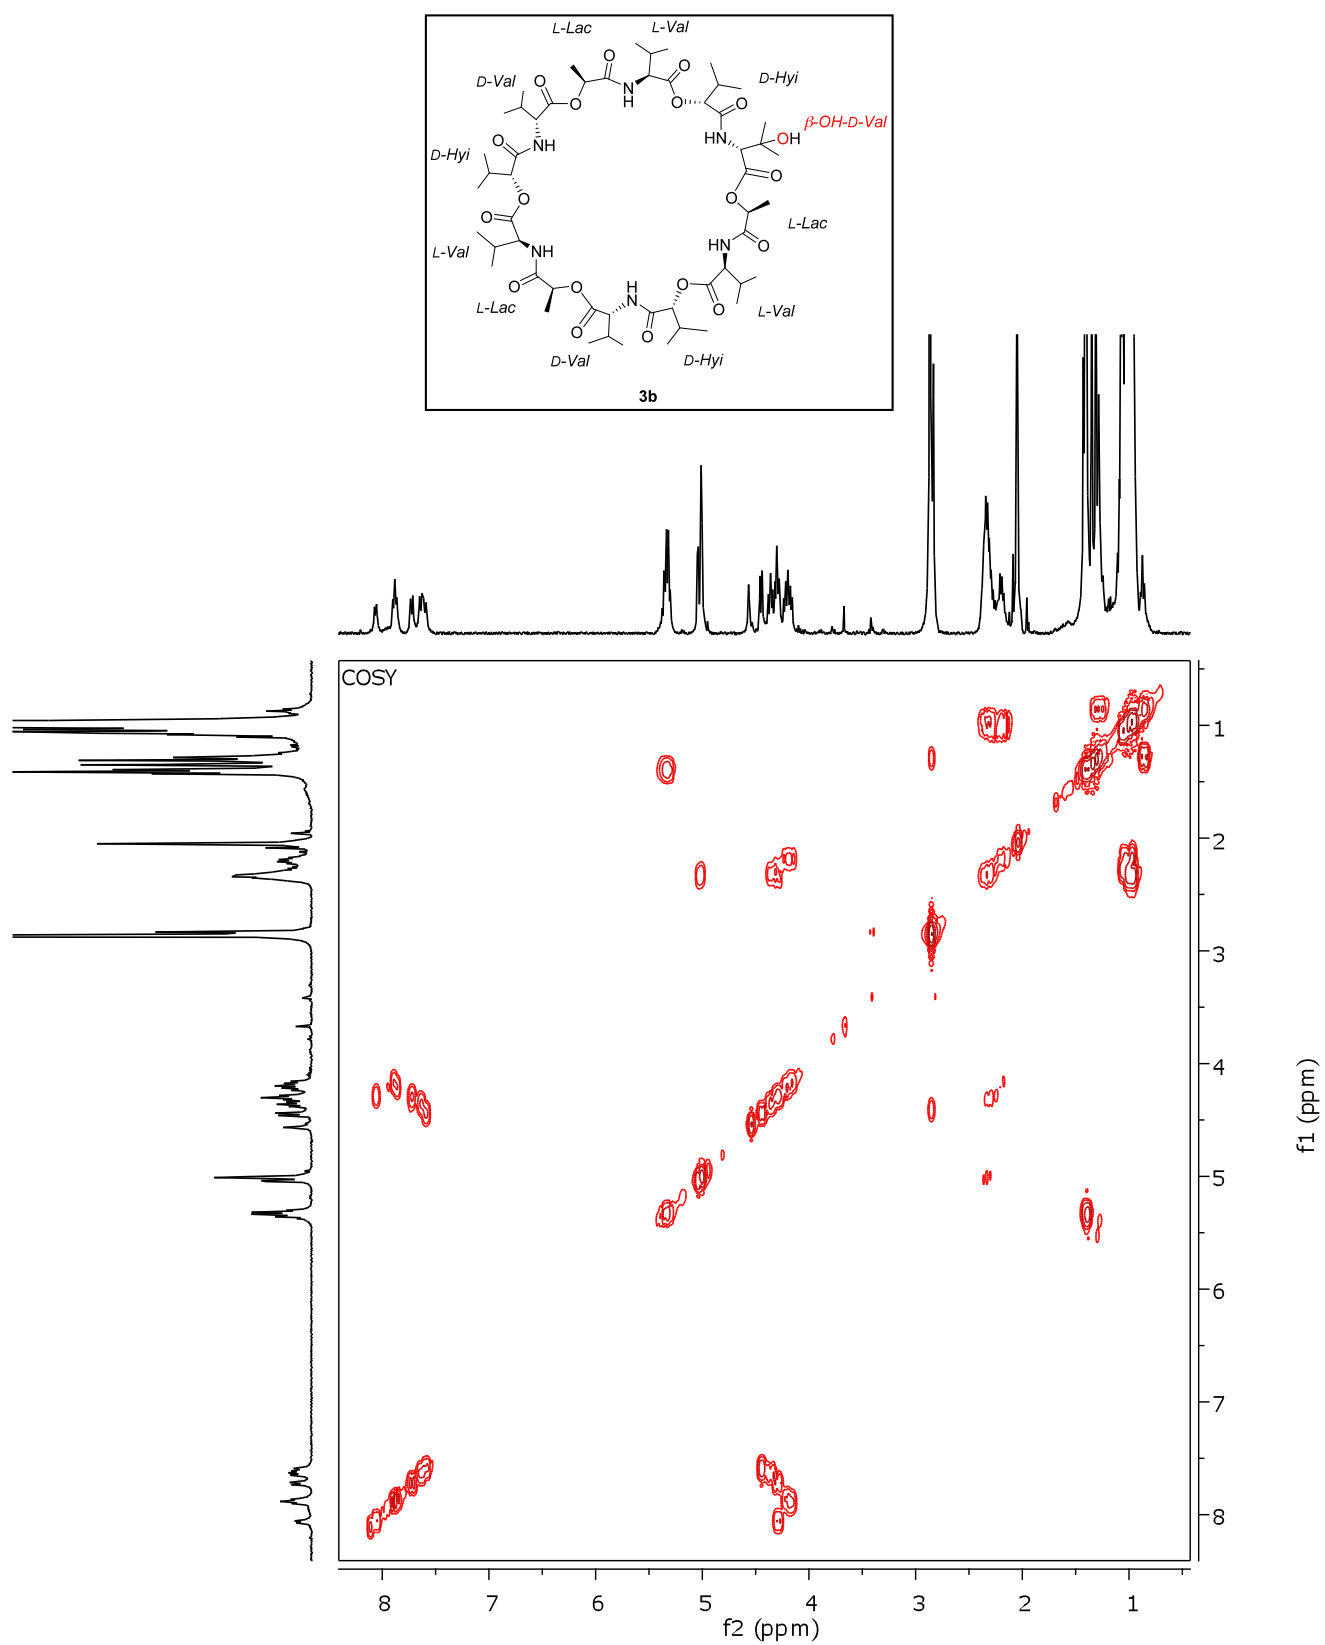

**Figure S10.** COSY NMR spectrum of compound **3b** (acetone- $d_6$ , 400 MHz).



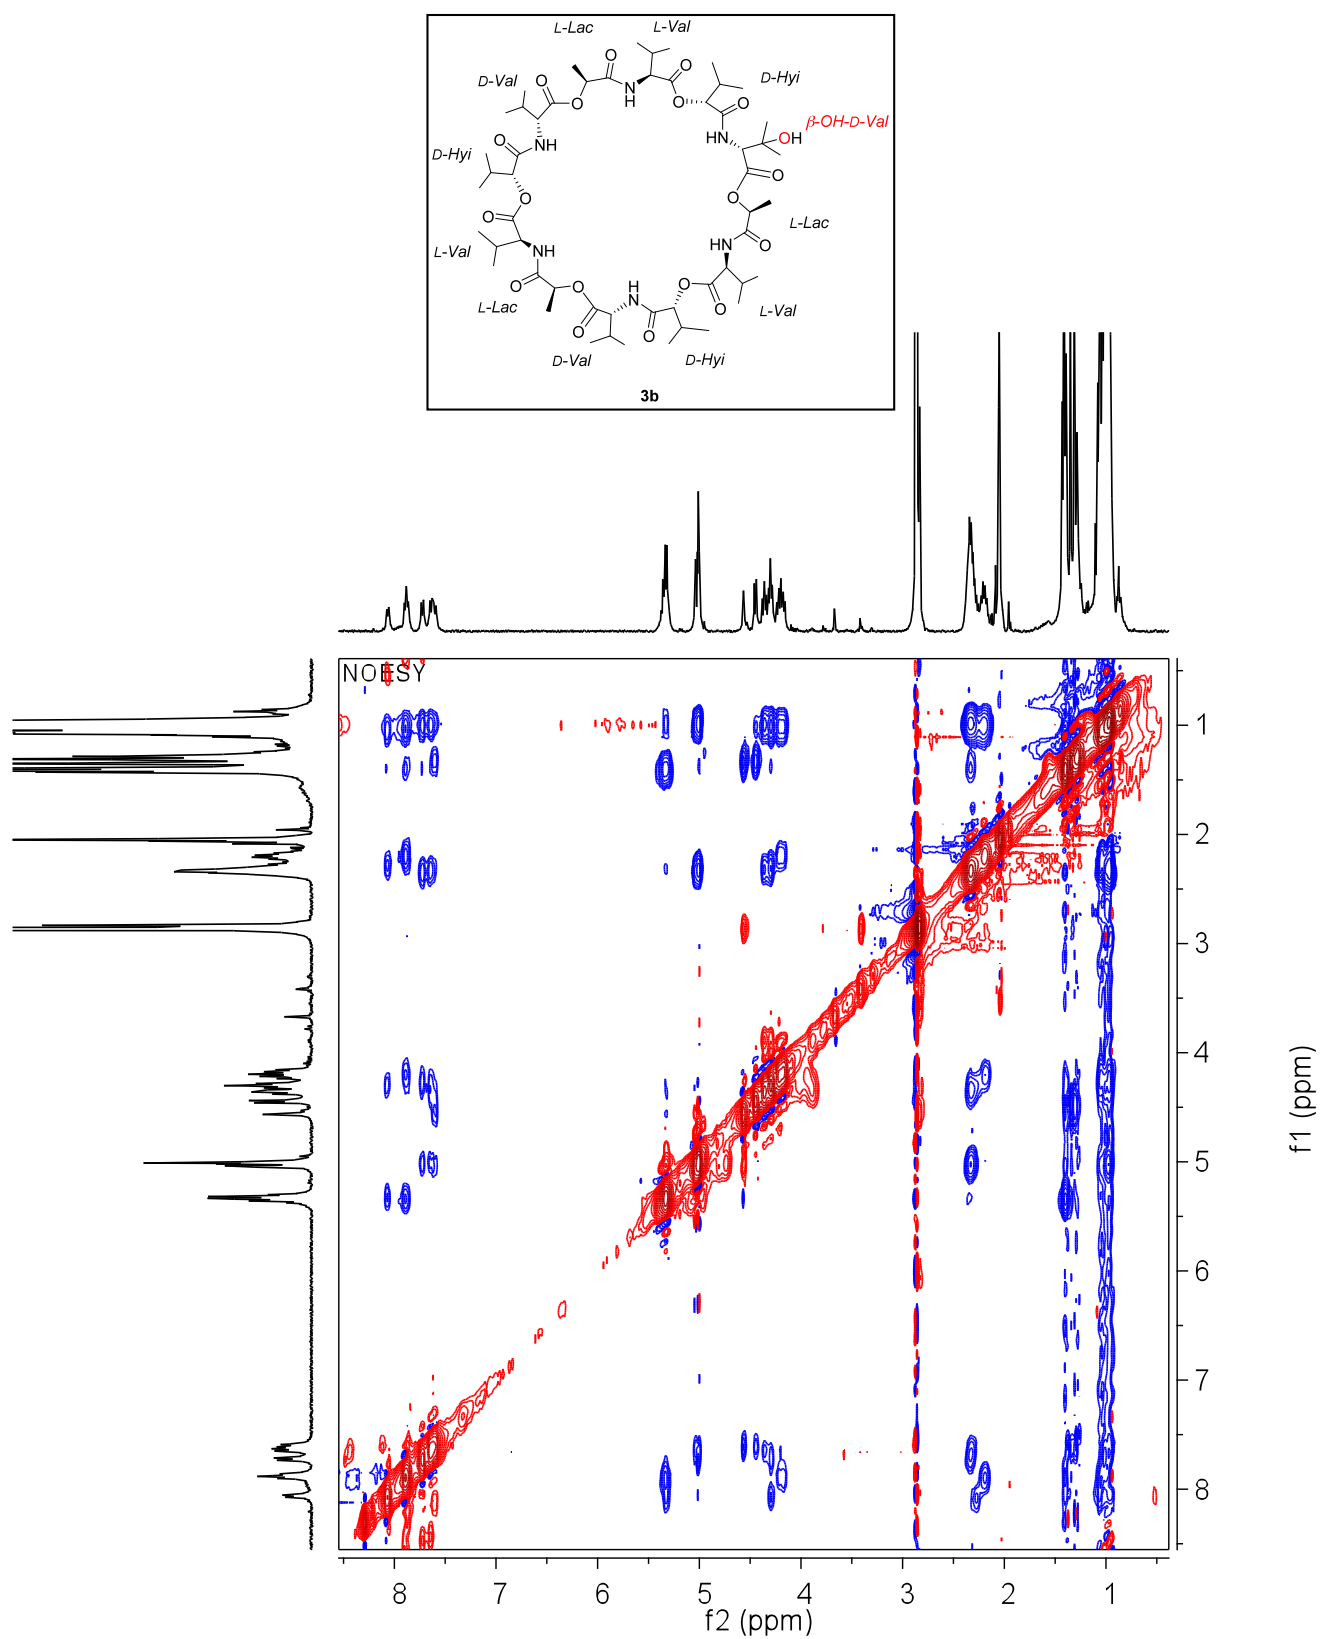

**Figure S11.** NOESY NMR spectrum of compound **3b** (acetone- $d_6$ , 400 MHz,  $t_{\text{mix}} = 0.35$  sec).

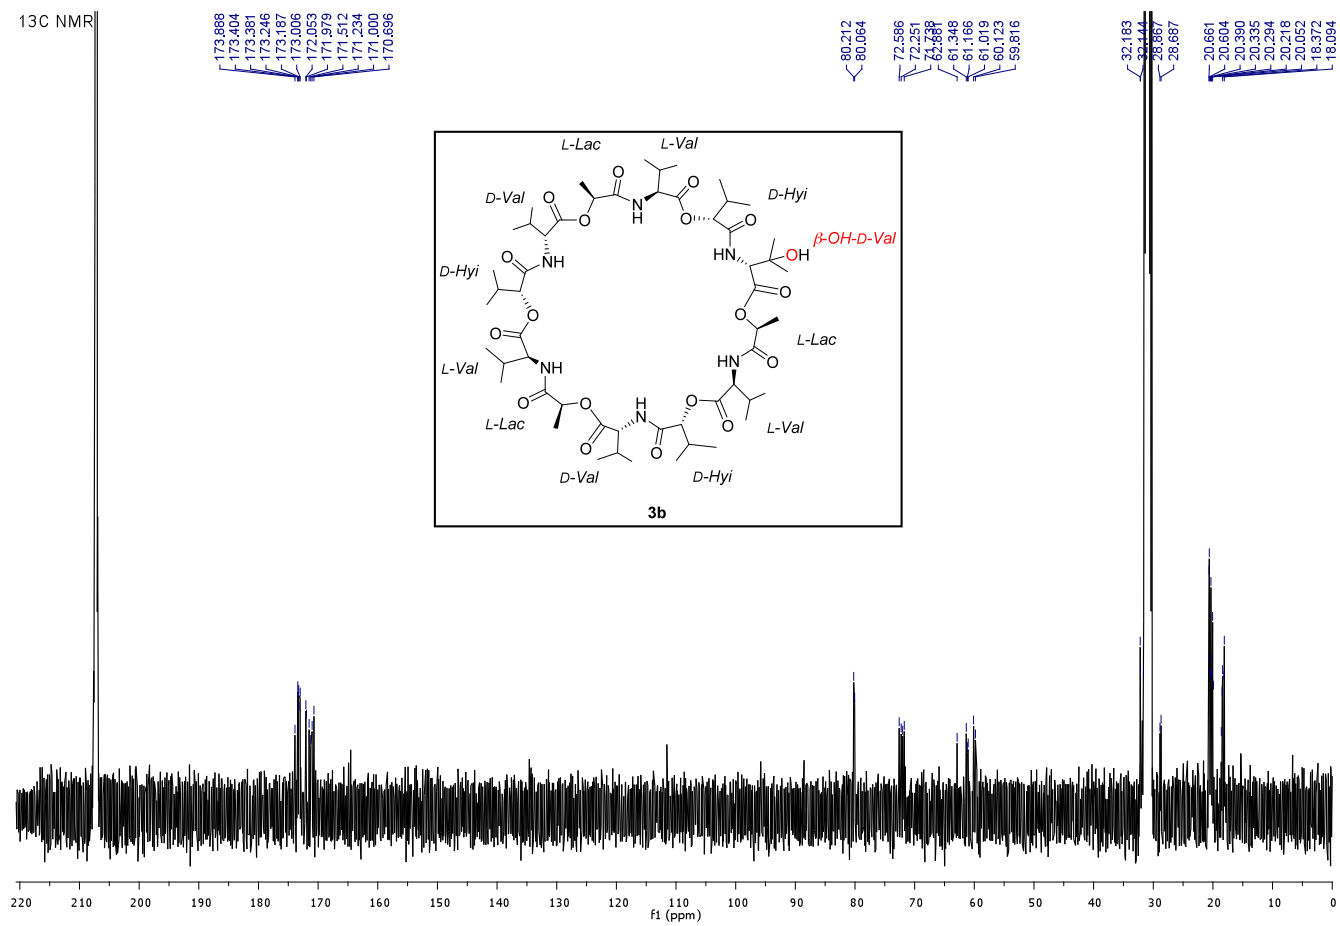

**Figure S12.**  $^{13}\text{C}$  NMR spectrum of compound **3b** (acetone- $d_6$ , 100 MHz).

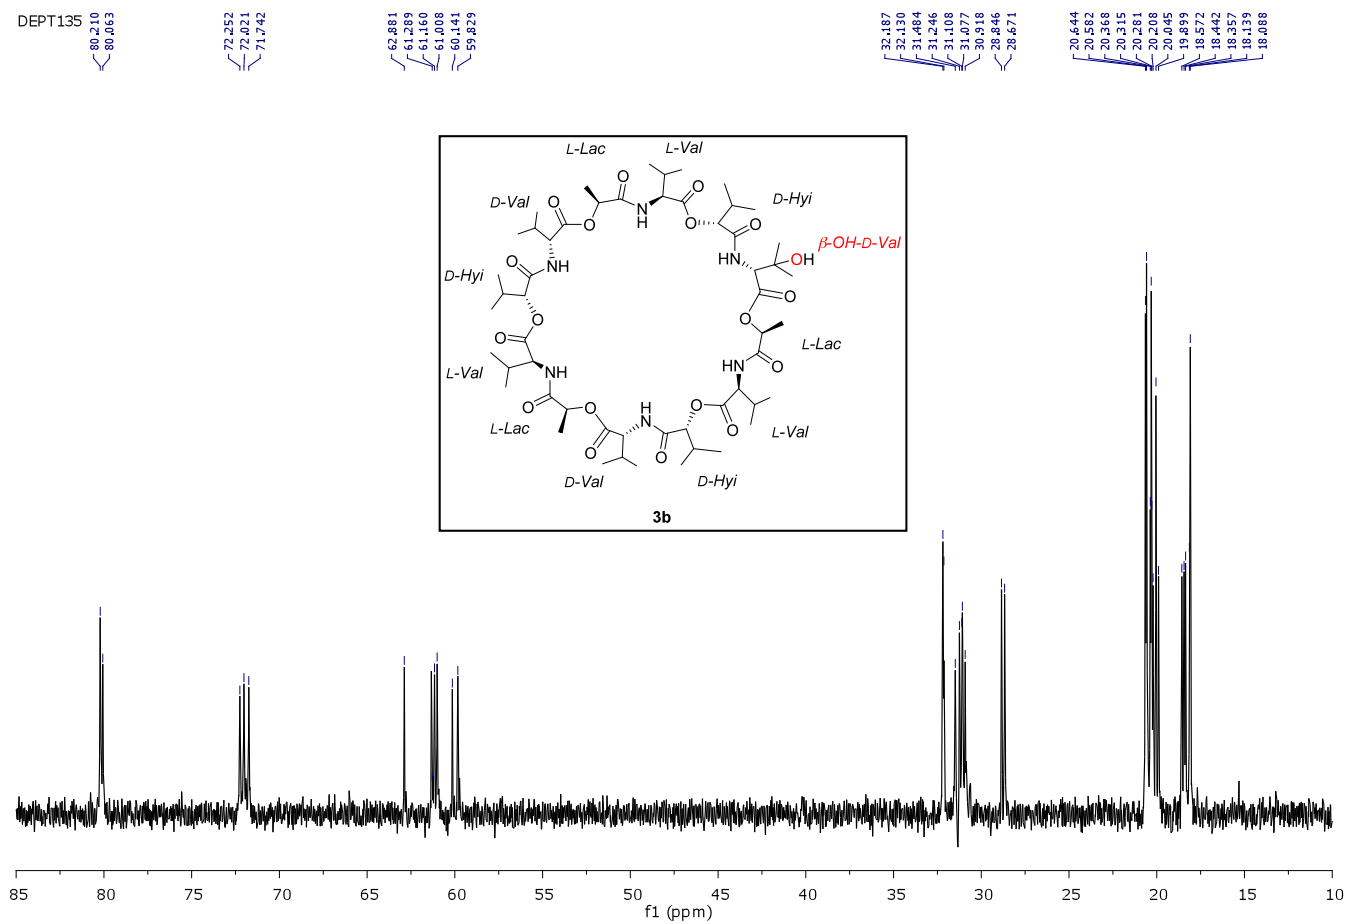

**Figure S13.**  $^{13}\text{C}$  DEPT-135 NMR spectrum of compound **3b** (acetone- $d_6$ , 100 MHz).

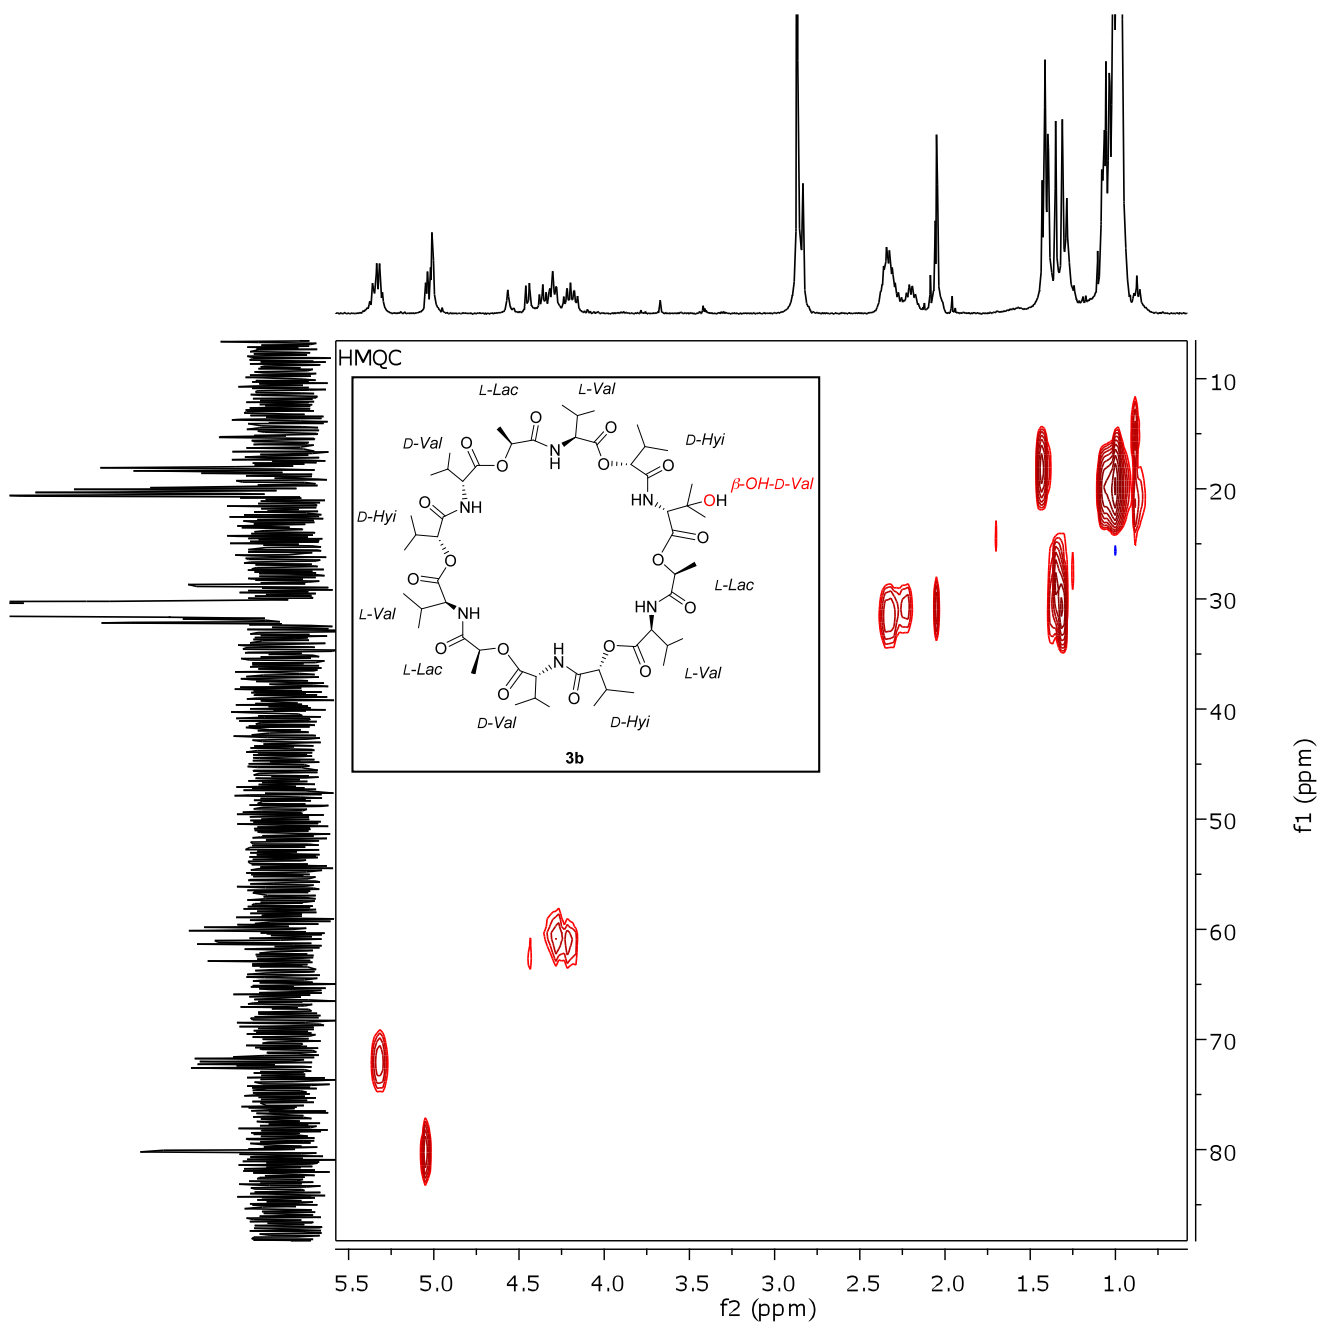

**Figure S14.** HMQC NMR spectrum of compound **3b** (acetone-*d*<sub>6</sub>, 400 MHz).

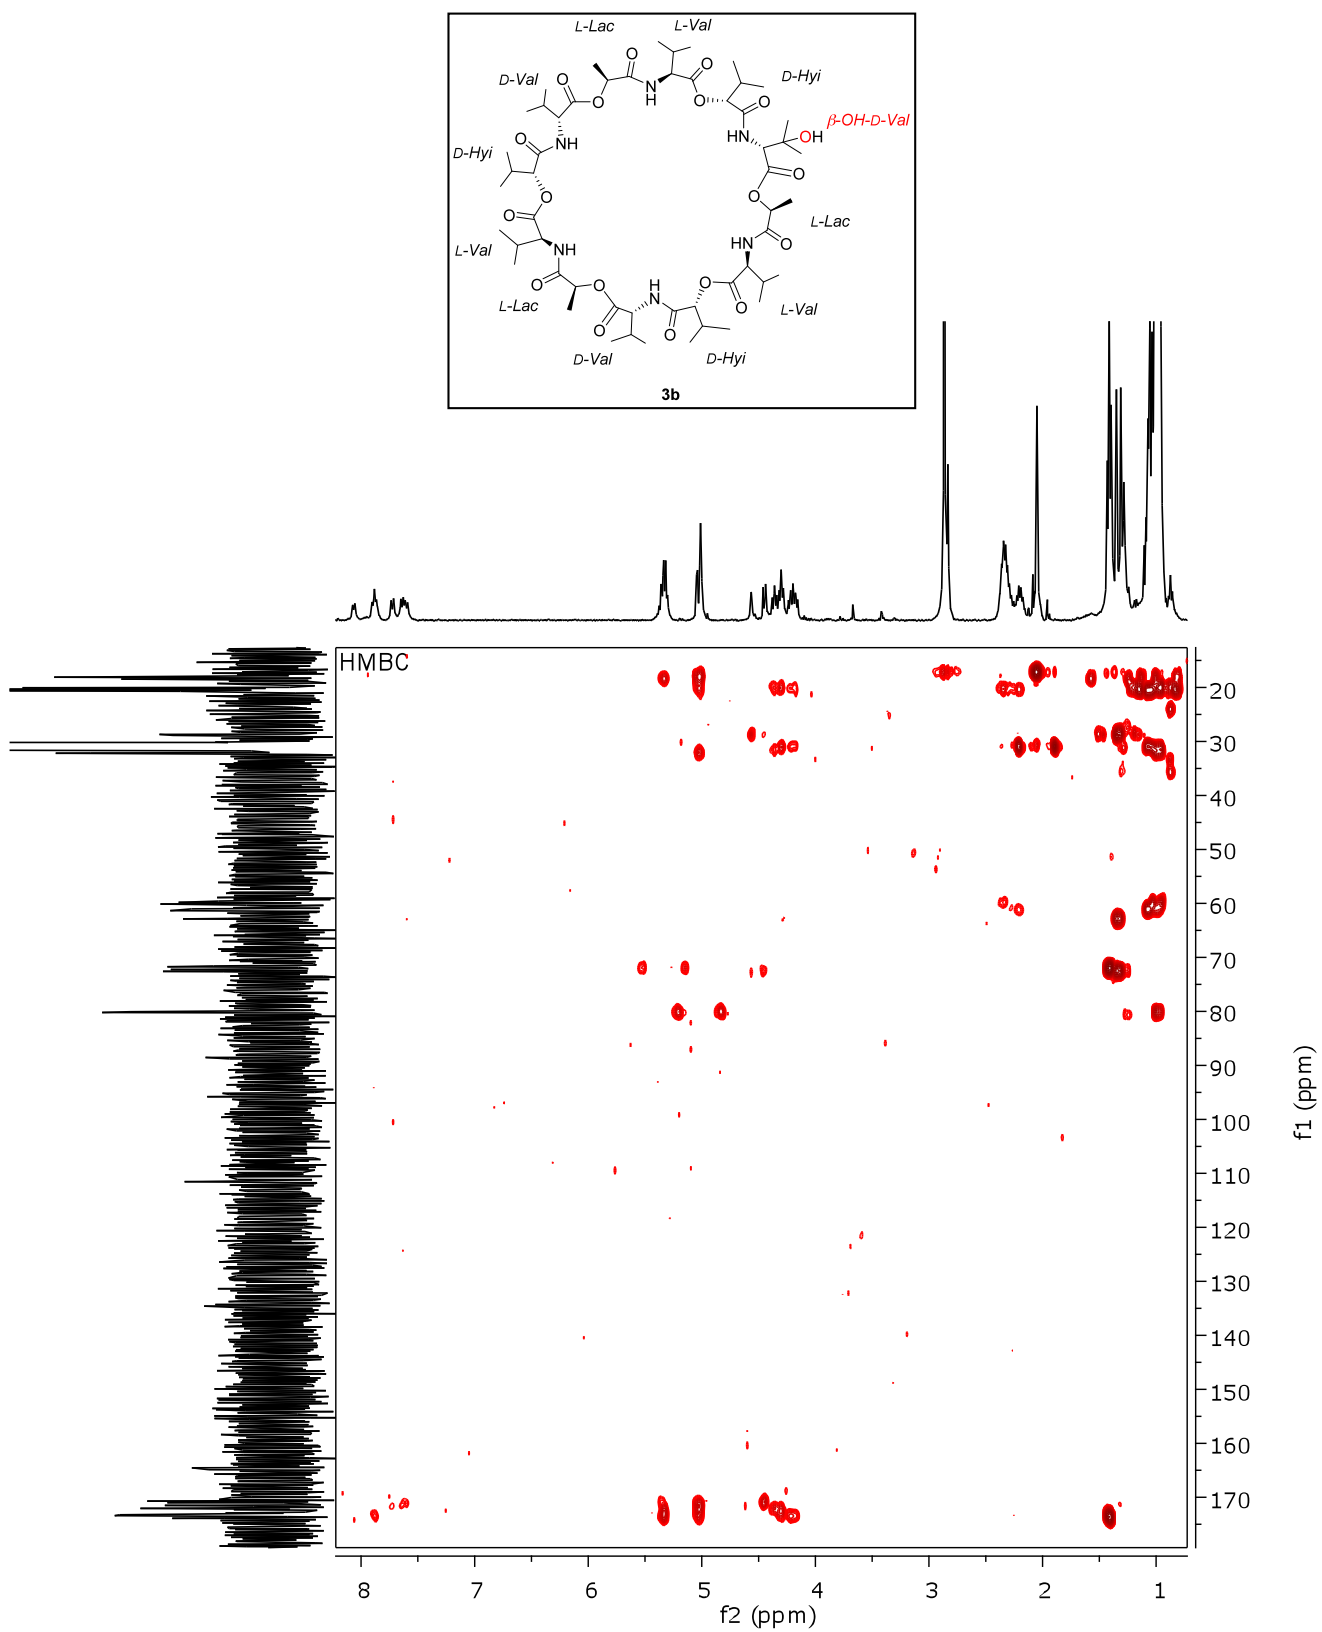

**Figure S15.** HMBC NMR spectrum of compound **3b** (acetone- $d_6$ , 400 MHz).

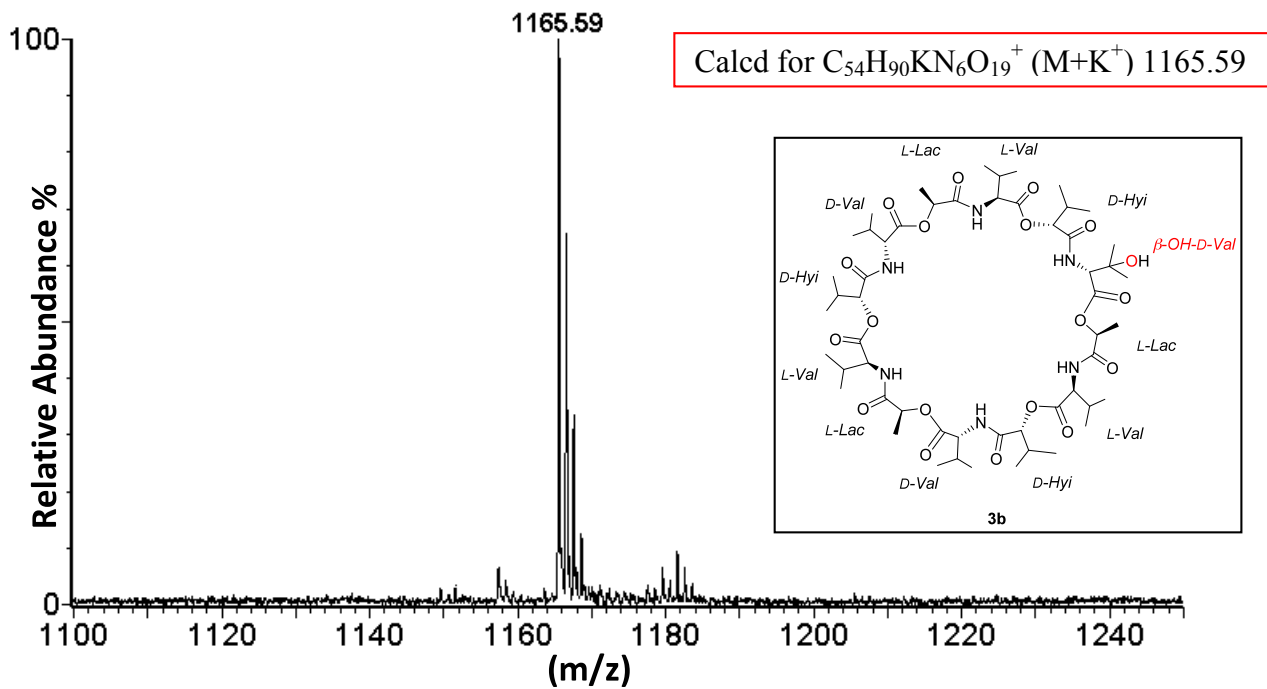

Figure S16. MALDI-ToF mass spectrum of compound **3b** in the presence of KCl.

## 5. 1D-, 2D NMR, and MALDI spectra of compound 3c.

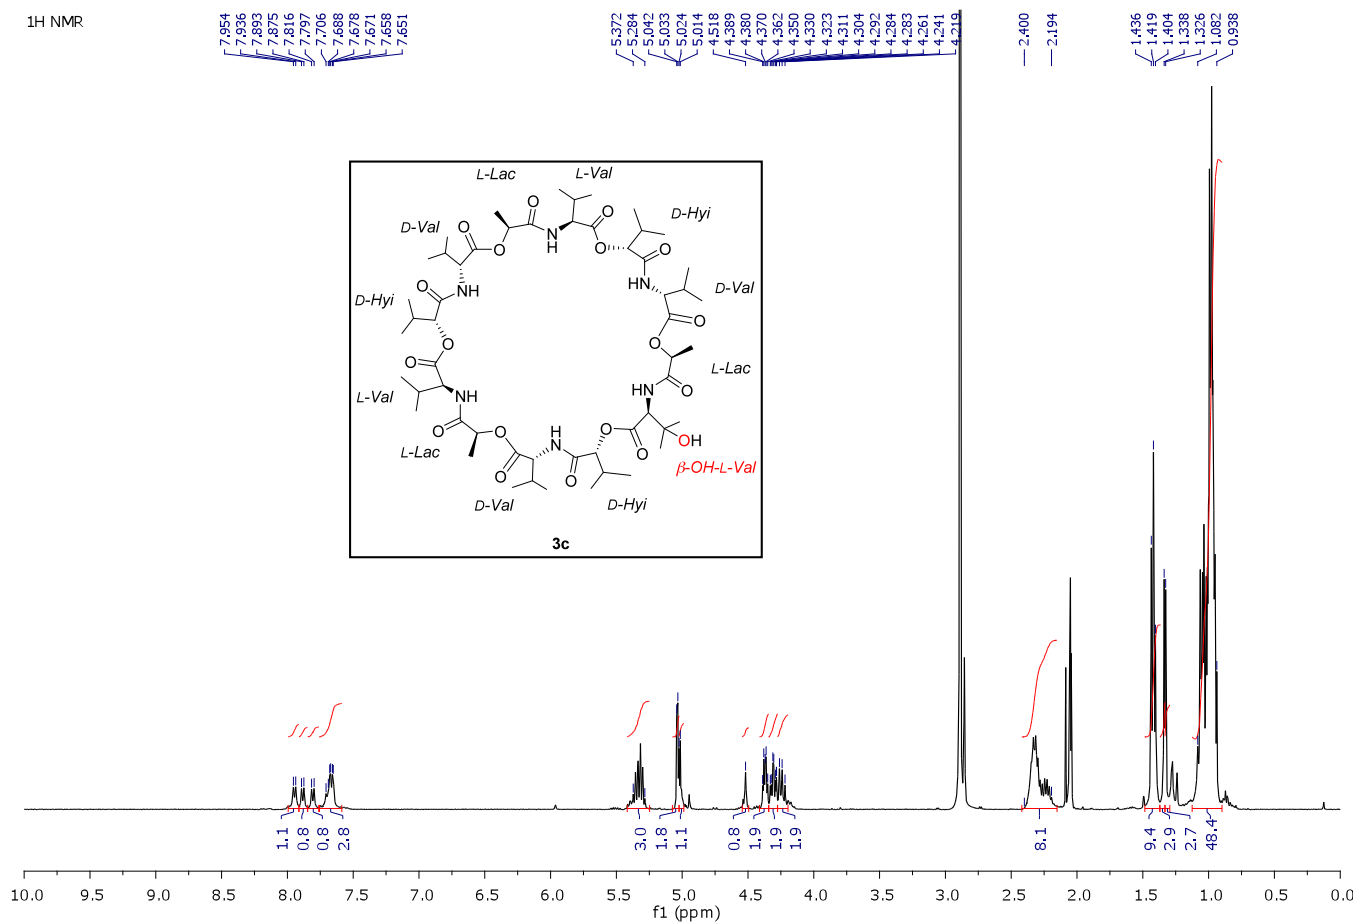

**Figure S17.** <sup>1</sup>H NMR spectrum of compound **3c** (acetone-*d*<sub>6</sub>, 400 MHz).

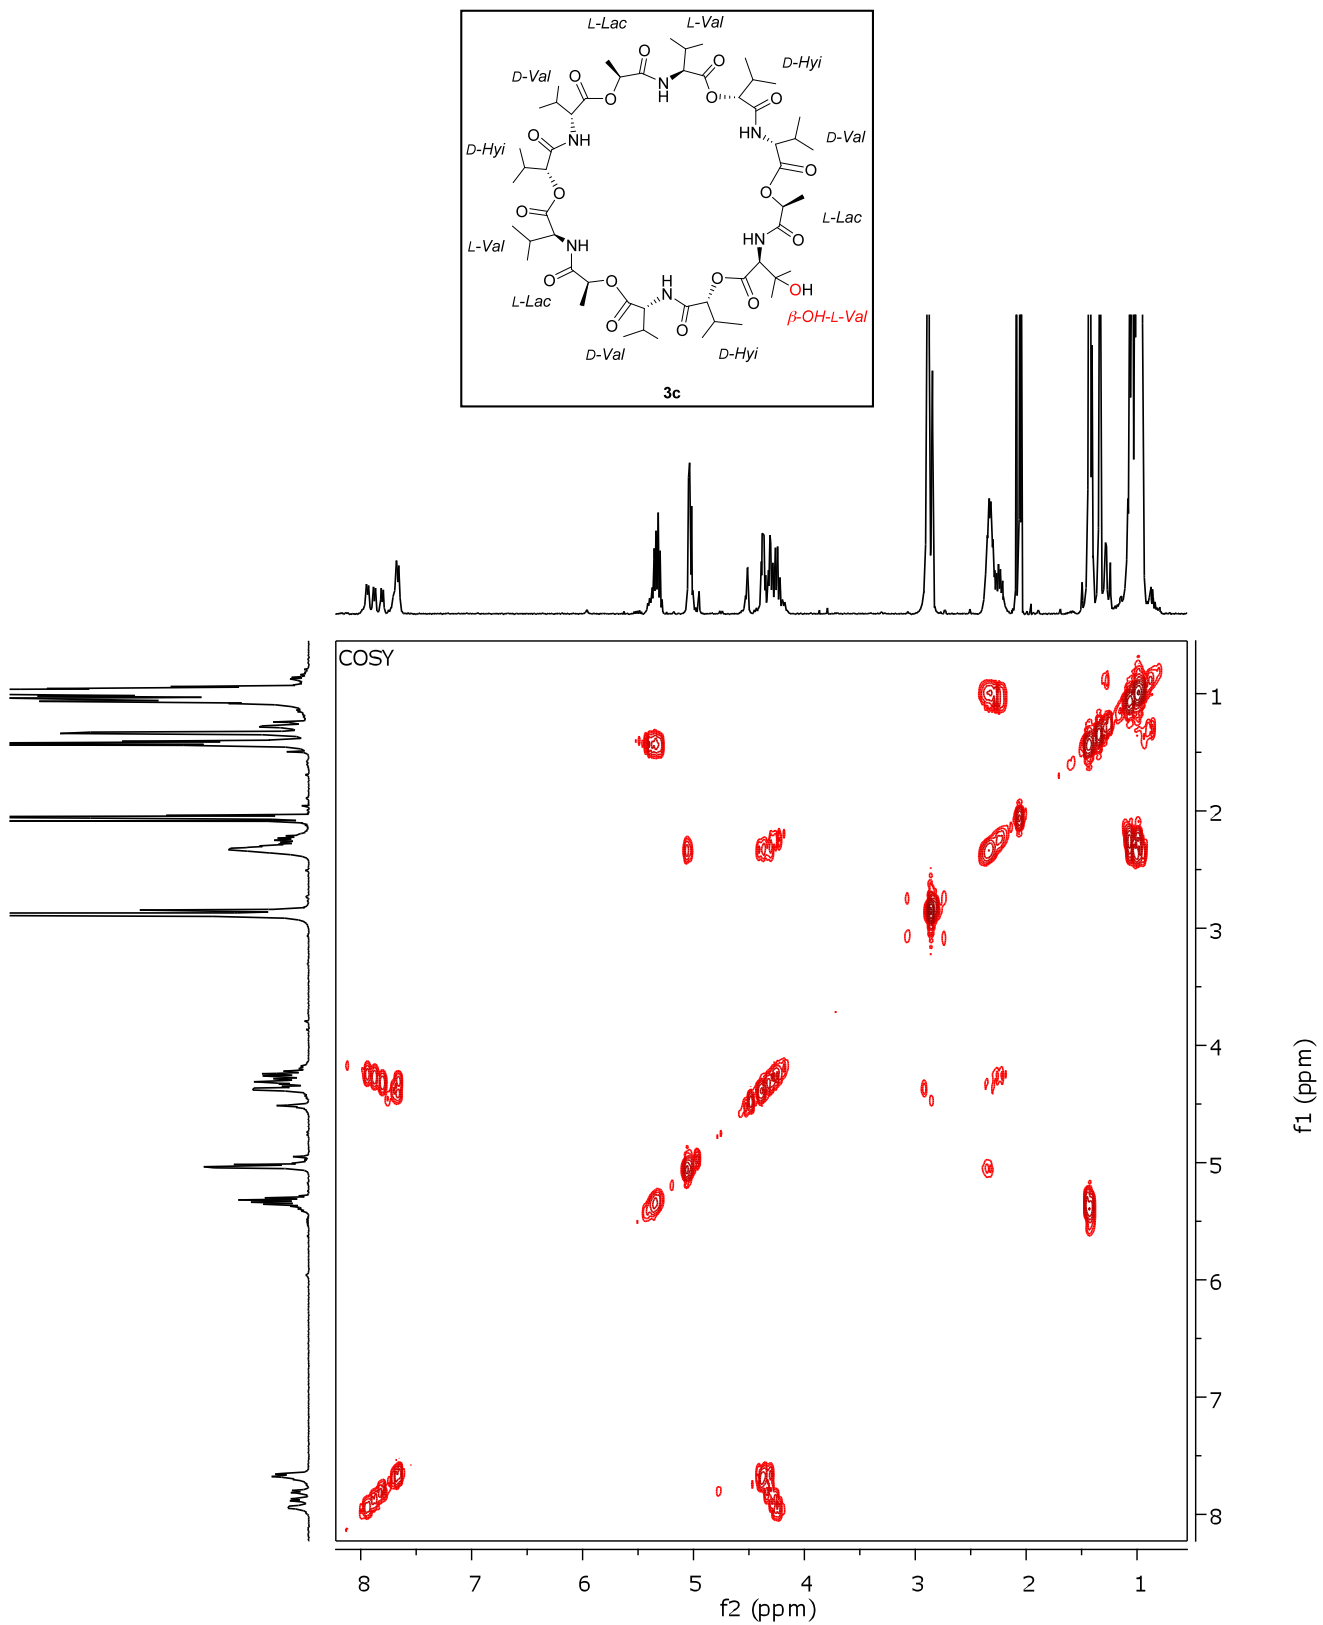

**Figure S18.** COSY NMR spectrum of compound **3c** (acetone- $d_6$ , 400 MHz).



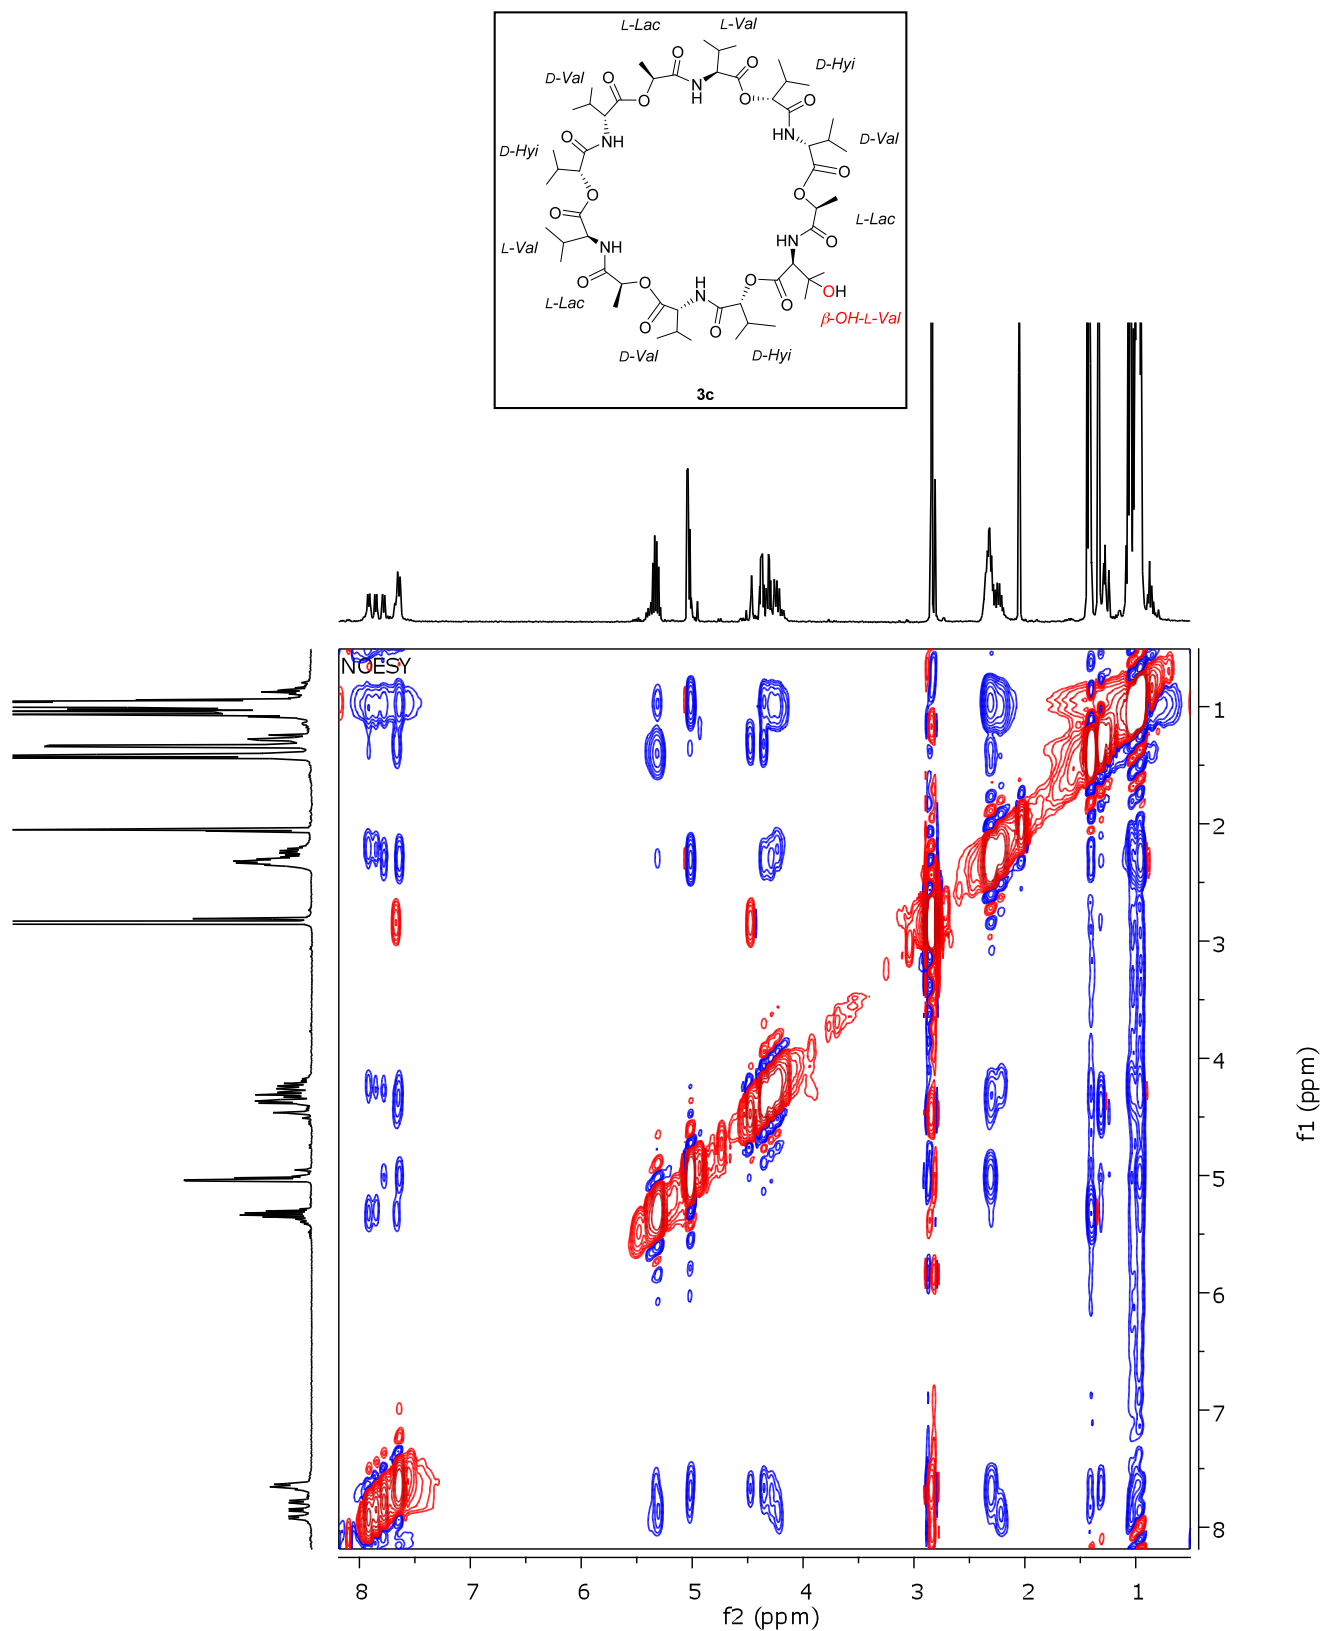

**Figure S19.** NOESY NMR spectrum of compound **3c** (acetone- $d_6$ , 400 MHz,  $t_{\text{mix}} = 0.35$  sec).

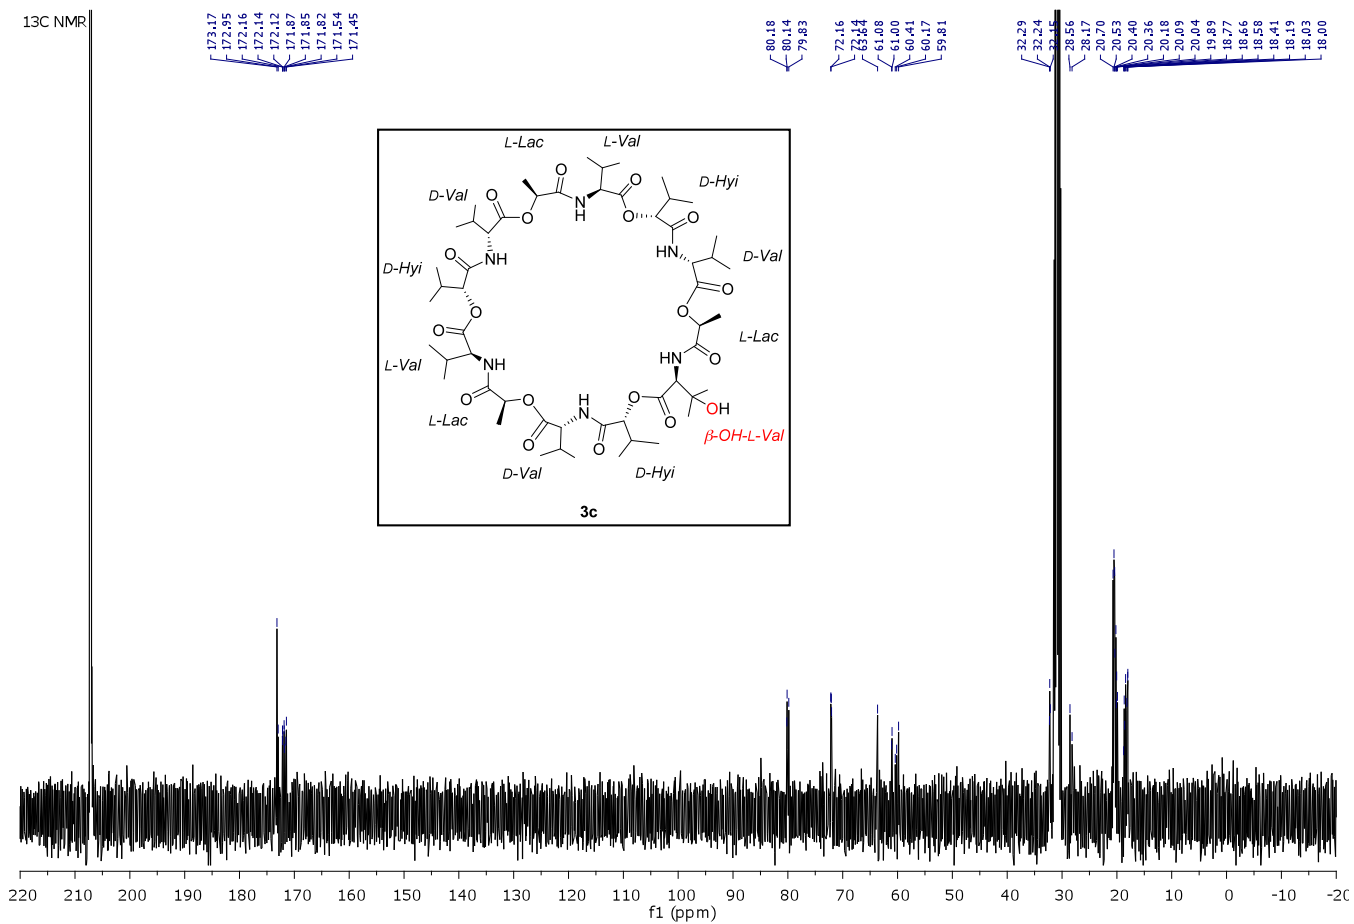

**Figure S20.** <sup>13</sup>C NMR spectrum of compound **3c** (acetone-*d*<sub>6</sub>, 100 MHz).

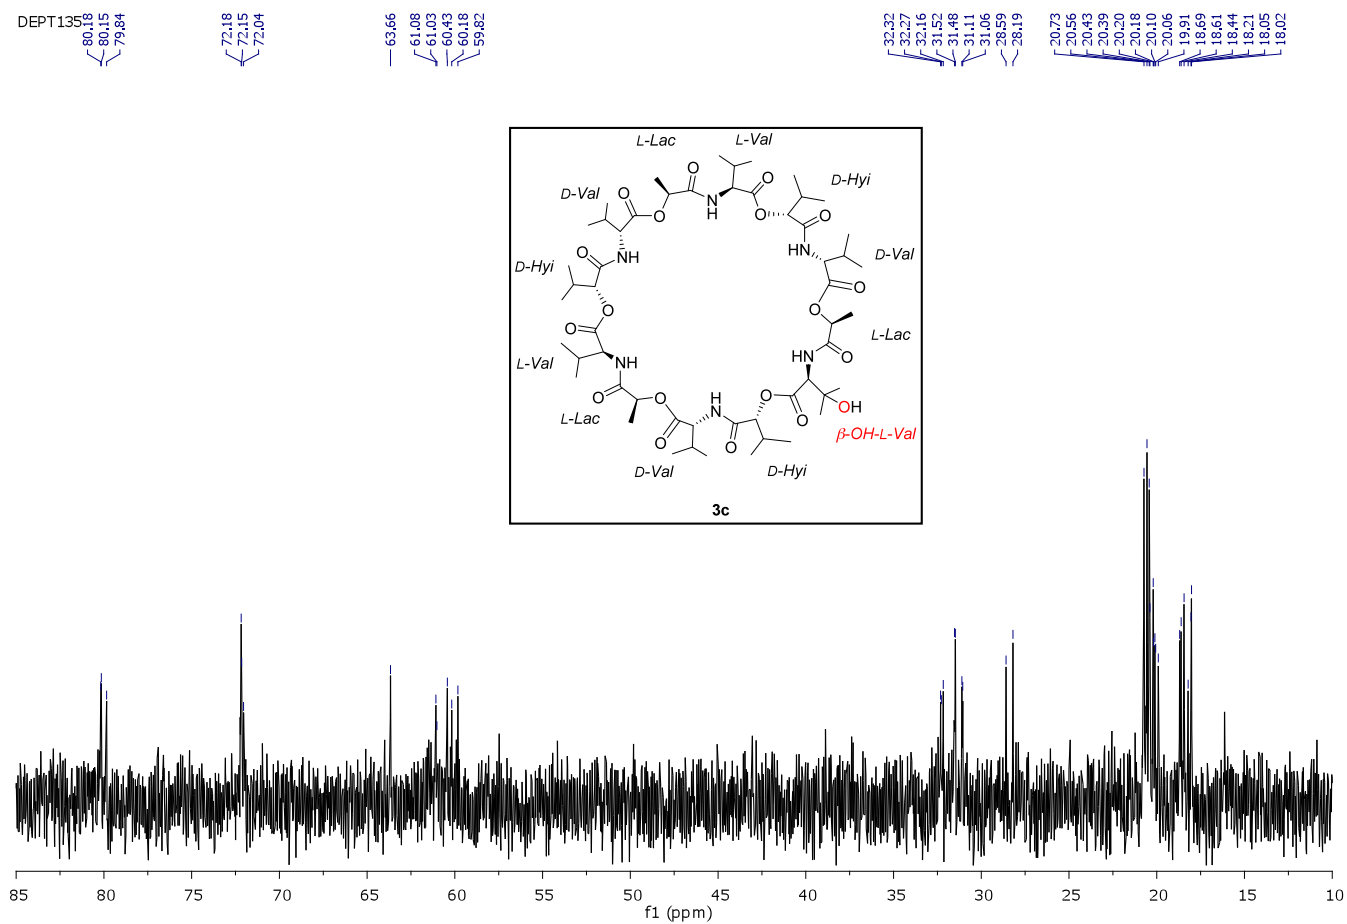

**Figure S21.**  $^{13}\text{C}$  DEPT-135 NMR spectrum of compound **3c** (acetone- $d_6$ , 100 MHz).

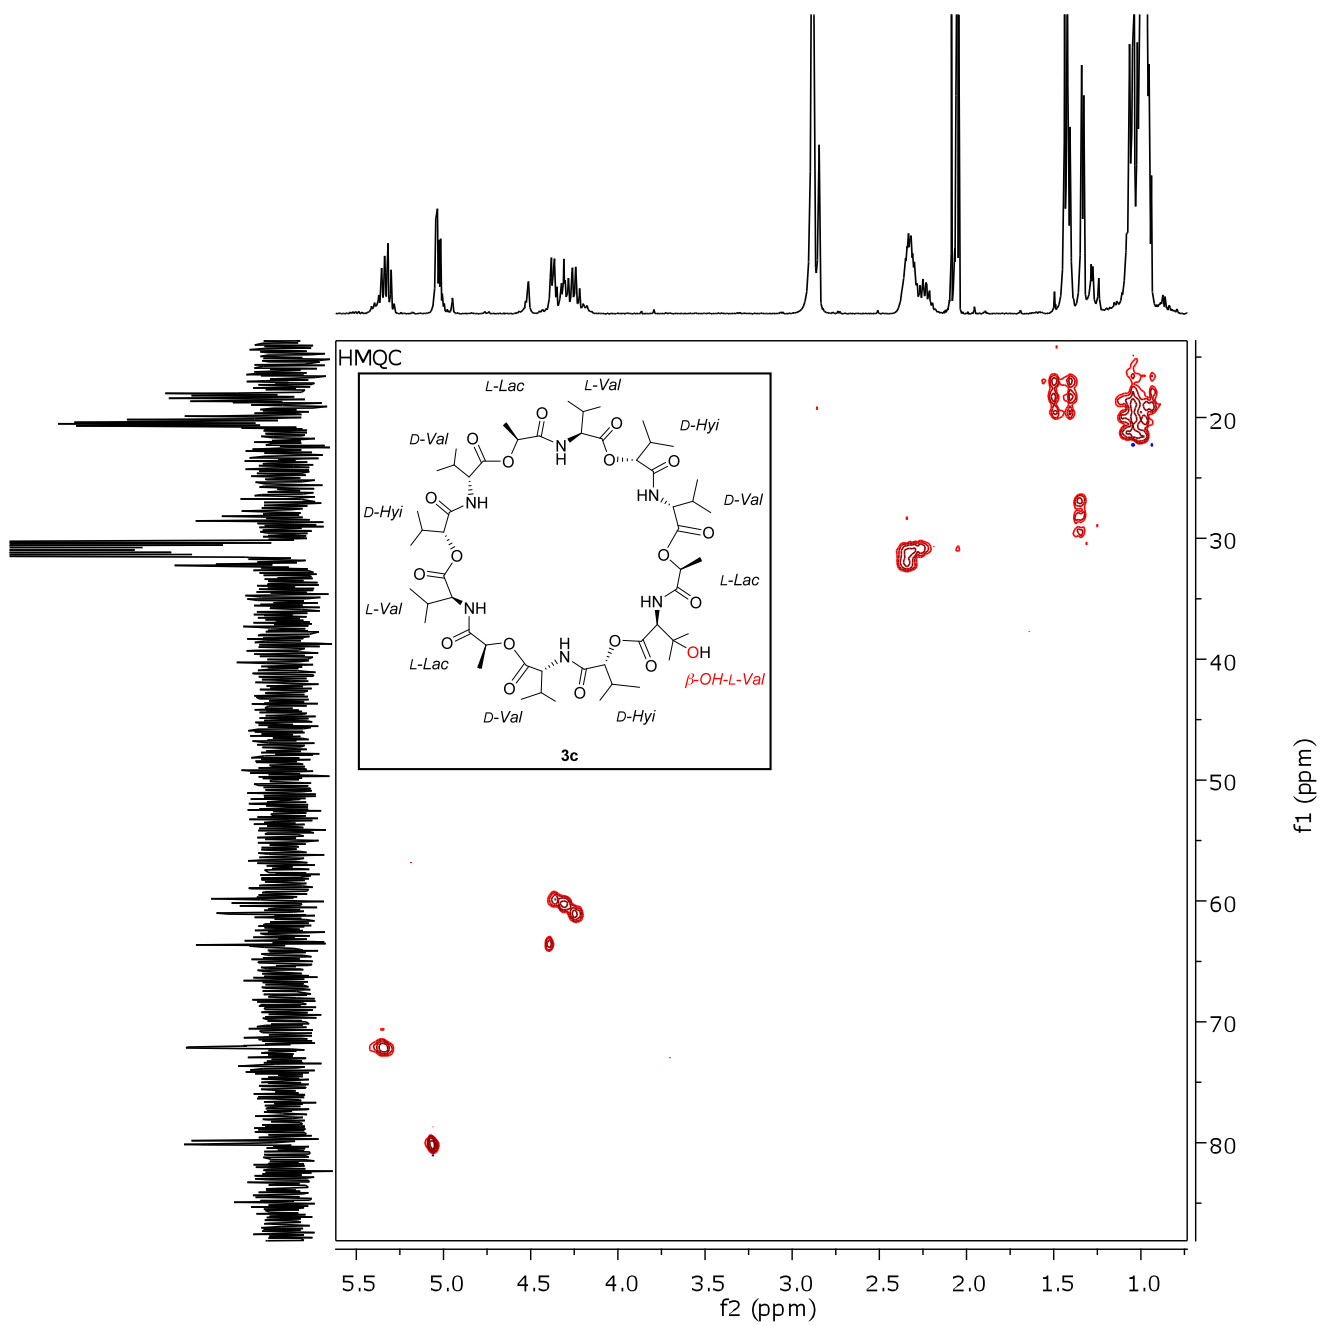

Figure S22. HMOC NMR spectrum of compound **3c** (acetone- $d_6$ , 400 MHz).

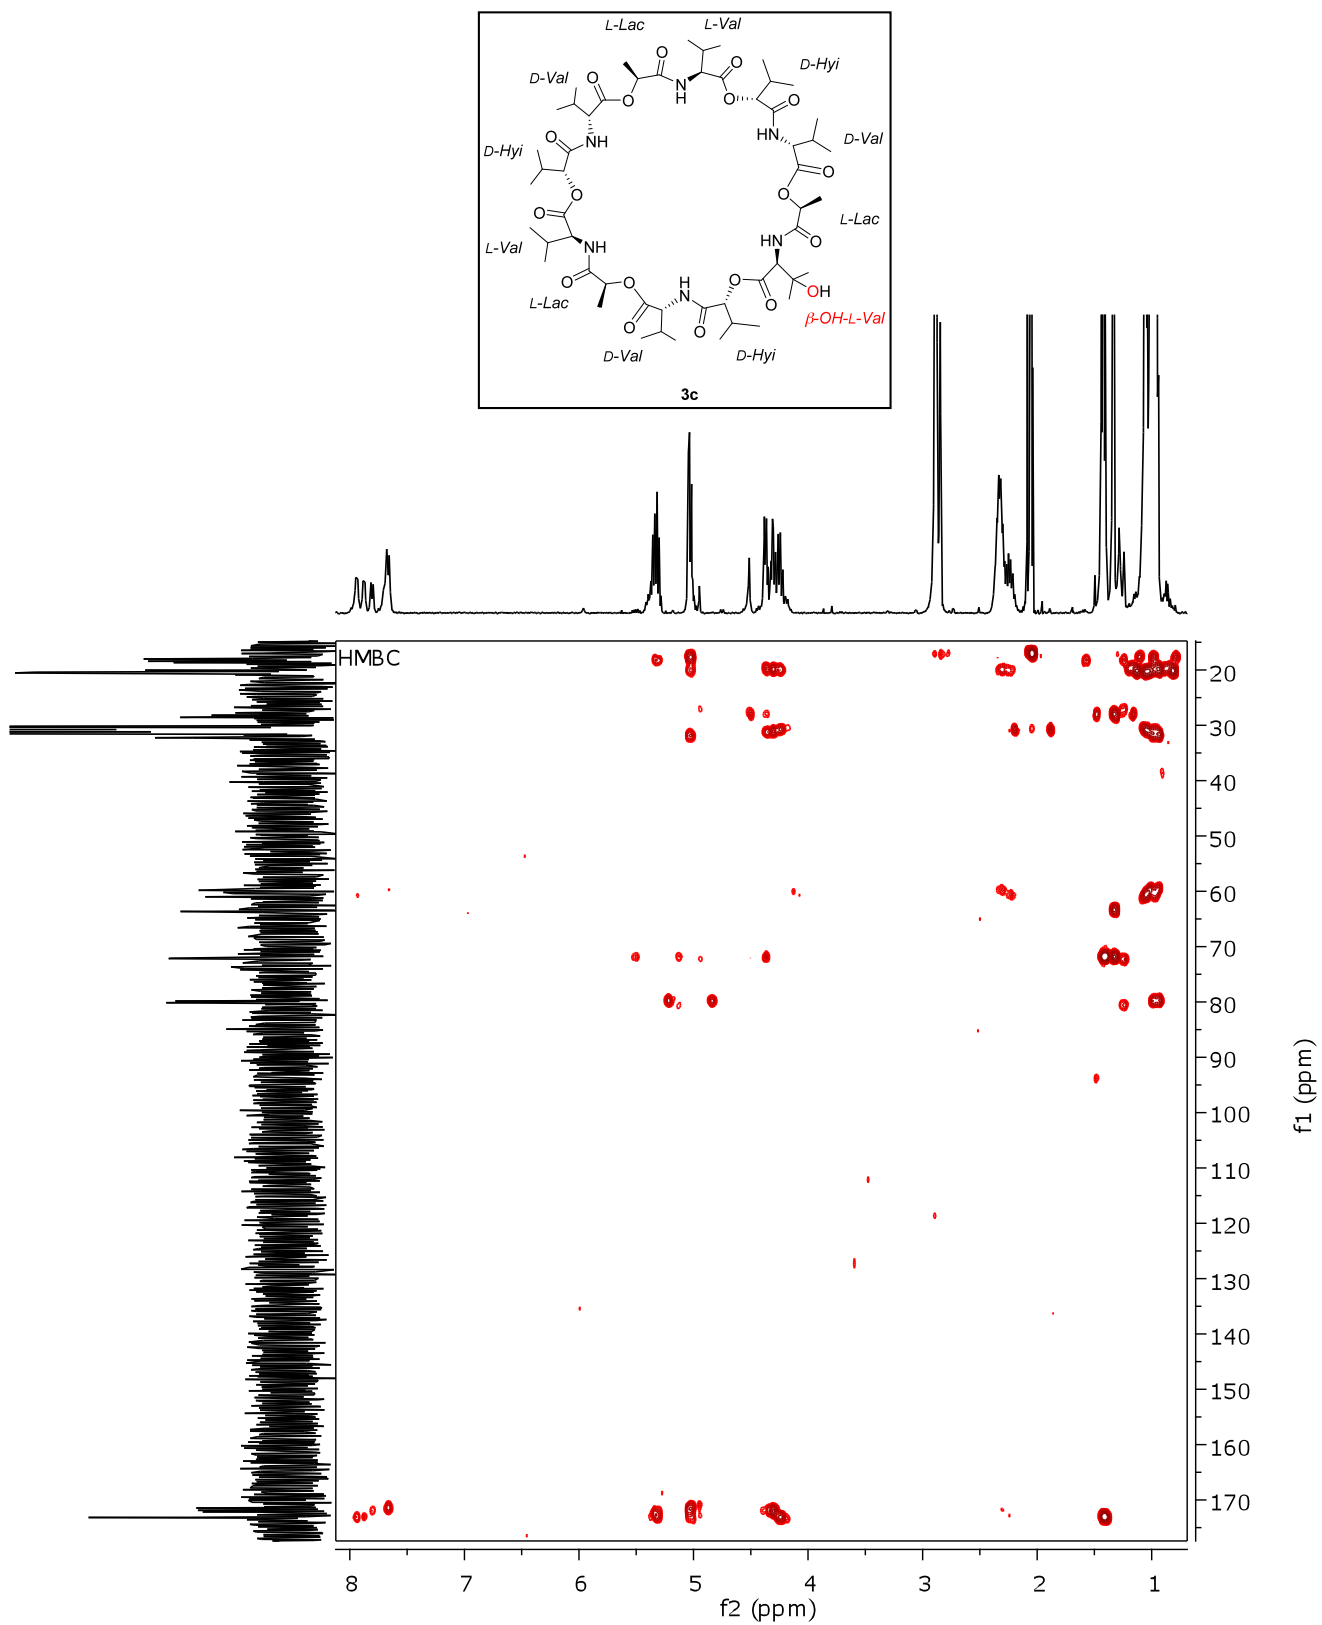

Figure S23. HMBC NMR spectrum of compound **3c** (acetone-*d*<sub>6</sub>, 400 MHz).

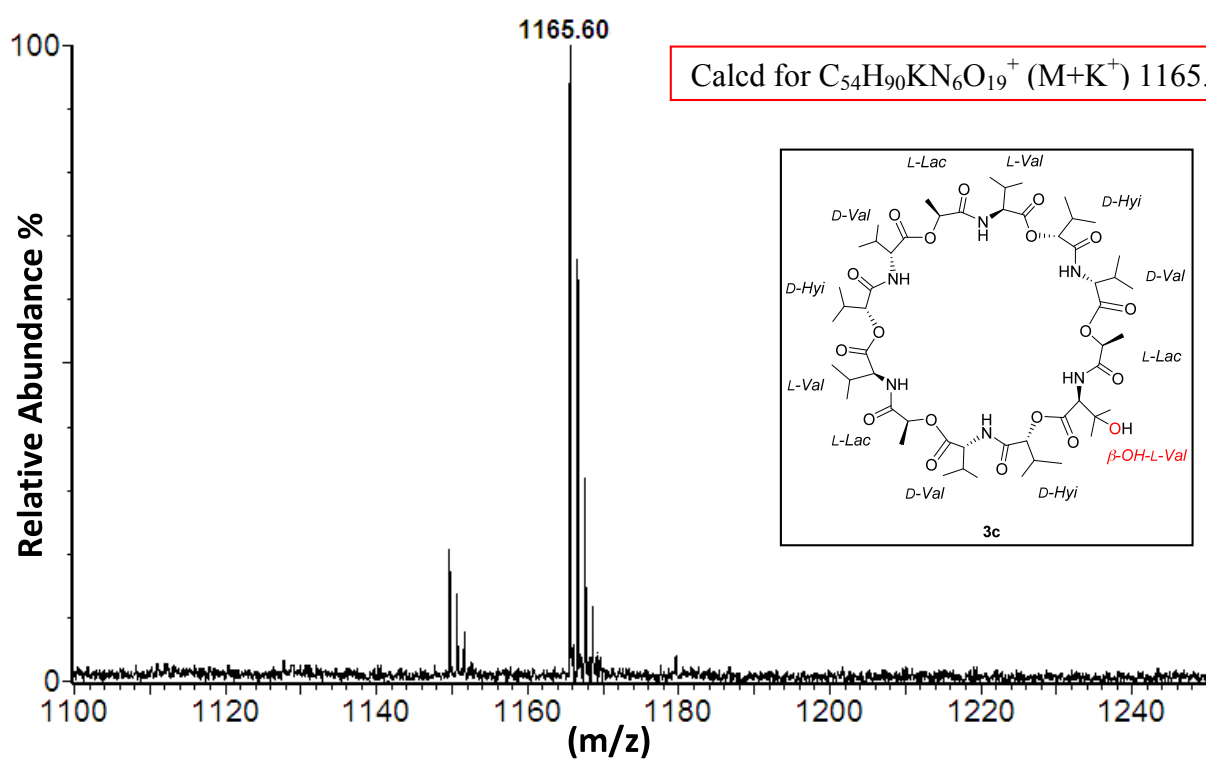

**Figure S24.** MALDI-ToF mass spectrum of compound **3c** in the presence of KCl.
